# Supplementary material for: Drug metabolism and drug transport of the 100 most prescribed oral drugs
Source: PubMed Central journal article supplement — Basic Clin Pharmacol Toxicol. 2022 Aug 24;131(5):311–24. doi: 10.1111/bcpt.13780 (PMC9804310; doi:10.1111/bcpt.13780), 2022-08-24
Supplement: BCPT-131-311-s001.pdf [file BCPT-131-311-s001.pdf]

Table S1. Drugs on top 100 list linked with enzymes and drug transporters involved in metabolism and transportation

| Drugs                         | Ranking | Phase I enzymes                                                     | Phase II enzymes                                                      | Drug transporters | References (phase I+II and prodrug) | References (drug transporters) |
|-------------------------------|---------|---------------------------------------------------------------------|-----------------------------------------------------------------------|-------------------|-------------------------------------|--------------------------------|
| <b>Analgesic</b>              |         |                                                                     |                                                                       |                   |                                     |                                |
| Paracetamol                   | 1       | CYP3A4/5, CYP2E1                                                    | SULT1A1, SULT1A3, SULT1A4, SULT1E1<br>UGT2B15, UGT1A9, UGT1A6, UGT1A1 |                   | 1-4                                 |                                |
| Codeine*                      | 7       | CYP3A4/5, CYP2D6                                                    | UGT2B7, UGT2B4                                                        |                   | 5-7                                 |                                |
| Ibuprofen                     | 12      | CYP2C9, CYP2C8                                                      | UGT1A9, UGT2B7, UGT2B4, UGT1A3                                        | OAT1, OAT3        | 8,9                                 | 10                             |
| Acetylsalicylic acid*         | 18      | CES2                                                                |                                                                       |                   | 11,12                               |                                |
| Tramadol*                     | 21      | CYP3A4/5, CYP2B6, CYP2D6                                            |                                                                       | OCT1              | 13,14                               | 15                             |
| Naproxen                      | 25      | CYP2C9 ( <b>major</b> ), CYP2C8, CYP1A2                             | UGT1A9, UGT2B7, UGT2B4, UGT1A3                                        | MCT-1             | 9,16                                | 17                             |
| Oxycodone                     | 33      | CYP3A4/5 ( <b>major</b> ), CYP2D6                                   |                                                                       |                   | 18                                  |                                |
| Diclofenac                    | 35      | CYP3A4/5, CYP2C9 ( <b>major</b> ), CYP2C19, CYP2C8, CYP2C18, CYP2B6 | UGT2B15, UGT1A9, UGT2B7 ( <b>major</b> ), UGT1A6                      | OAT2              | 19-21                               | 22                             |
| Gabapentin                    | 50      |                                                                     |                                                                       | OCTN1, LAT1       |                                     | 23                             |
| Morphine                      | 64      |                                                                     | UGT2B7                                                                | P-gp, OCT1        | 24                                  | 25,26                          |
| Pregabalin                    | 72      |                                                                     |                                                                       | LAT1              |                                     | 27                             |
| Ethylmorphine*                | 82      | CYP2D6                                                              |                                                                       |                   | 28,29                               |                                |
| Dihydrocodeine tartrate       | 86      | CYP2D6                                                              |                                                                       |                   | 30                                  |                                |
| <b>Proton pump Inhibitors</b> |         |                                                                     |                                                                       |                   |                                     |                                |
| Omeprazole*                   | 4       | CYP3A4/5, CYP2C19 ( <b>major</b> )                                  |                                                                       | P-gp              | 31,32                               | 33                             |

|                                          |    |                                                                     |  |            |       |       |
|------------------------------------------|----|---------------------------------------------------------------------|--|------------|-------|-------|
| Pantoprazole*                            | 13 | CYP3A4/5, CYP2C19<br>(major)                                        |  | BCRP       | 32,34 | 35    |
| Esomeprazole*                            | 15 | CYP3A4/5, CYP2C19<br>(major)                                        |  |            | 31,32 |       |
| Lansoprazole*                            | 22 | CYP3A4/5, CYP2C19<br>(major)                                        |  | P-gp       | 32,36 | 33    |
| <b>Anticoagulants</b>                    |    |                                                                     |  |            |       |       |
| Clopidogrel*                             | 36 | CYP2C9, CYP2C19,<br>CYP2B6, CYP1A2, CES1<br>(major)                 |  | P-gp, OAT1 | 37-39 | 40,41 |
| Warfarin                                 | 45 | CYP3A4/5, CYP2C9<br>(major), CYP2C19,<br>CYP2C8, CYP2C18,<br>CYP1A2 |  | OAT2       | 42    | 43    |
| Apixaban                                 | 53 | CYP3A4/5 (major),<br>CYP2C9, CYP2C19,<br>CYP2C8, CYP1A2,<br>CYP2J2  |  | P-gp, BCRP | 44    | 45    |
| Rivaroxaban                              | 67 | CYP3A4/5, CYP2J2                                                    |  | P-gp, BCRP | 46    | 47    |
| <b>Antidepressants and antipsychotic</b> |    |                                                                     |  |            |       |       |
| Sertralin                                | 19 | CYP3A4/5, CYP2C9,<br>CYP2C19, CYP2B6,<br>CYP2D6                     |  | P-gp       | 48    | 49    |
| Amitriptylin                             | 29 | CYP2D6                                                              |  |            | 50    |       |
| Citalopram                               | 30 | CYP3A4/5 (major),<br>CYP2C19 (major),<br>CYP2D6, MAO-A, MAO-<br>B   |  |            | 51,52 |       |
| Mirtazapine                              | 34 | CYP3A4/5, CYP1A2,<br>CYP2D6                                         |  |            | 53    |       |
| Escitalopram                             | 47 | CYP3A4/5, CYP2C19,<br>CYP2D6                                        |  | P-gp       | 54    | 55    |

|                         |    |                                                            |                |                                                                      |       |       |
|-------------------------|----|------------------------------------------------------------|----------------|----------------------------------------------------------------------|-------|-------|
| Venlafaxine             | 48 | CYP3A3, CYP3A4/5, CYP2C9, CYP2C19, CYP2D6 ( <b>major</b> ) |                |                                                                      | 56,57 |       |
| Fluoxetine              | 52 | CYP2C9, CYP2C19, CYP2D6 ( <b>major</b> )                   |                |                                                                      | 58    |       |
| Quetiapine              | 65 | CYP3A4/5 ( <b>major</b> ), CYP2D6                          |                | P-gp                                                                 | 59    | 60    |
| Duloxetine              | 85 | CYP1A2, CYP2D6                                             |                |                                                                      | 61    |       |
| Lamotrigine             | 88 |                                                            | UGT2B7, UGT1A4 | P-gp, BCRP, OCT1                                                     | 62    | 63-65 |
| <b>Antidiabetics</b>    |    |                                                            |                |                                                                      |       |       |
| Metformin               | 9  |                                                            |                | MATE1, MATE2-K, OCT1, OCT2 ( <b>major</b> ), SERT, PMAT, THTR-2, CHT |       | 66-70 |
| Gliclazide              | 69 | CYP2C9 ( <b>major</b> ), CYP2C19                           |                |                                                                      | 71    |       |
| Sitagliptin             | 89 | CYP3A4/5 ( <b>major</b> ), CYP2C8                          |                | P-gp, OAT3, OATP4C1                                                  | 72    | 73    |
| <b>Antibiotics</b>      |    |                                                            |                |                                                                      |       |       |
| Phenoxymethylpenicillin | 8  |                                                            |                |                                                                      |       |       |
| Amoxicillin             | 10 |                                                            |                | PepT 1, PepT 2                                                       |       | 74    |
| Pivmecillinam*          | 40 |                                                            |                |                                                                      | 75    |       |
| Doxycycline             | 46 |                                                            |                |                                                                      |       |       |
| Trimethoprim            | 55 | CYP3A4/5 ( <b>major</b> ), CYP2C9 ( <b>major</b> ), CYP1A2 |                | MATE1, MATE2-K                                                       | 76    | 77    |
| Flucloxacillin          | 61 | CYP3A4/5 ( <b>major</b> ), CYP3A7, CYP2C9                  |                |                                                                      | 78    |       |
| Cephalexin              | 73 |                                                            |                | PepT 1                                                               |       | 79    |
| Metronidazole*          | 75 | CYP2A6                                                     |                |                                                                      | 80,81 |       |
| Dicloxacillin           | 77 |                                                            |                | P-gp                                                                 |       | 82    |

|                             |     |                                                   |                                 |                                                           |         |         |
|-----------------------------|-----|---------------------------------------------------|---------------------------------|-----------------------------------------------------------|---------|---------|
| Nitrofurantoin*             | 78  |                                                   |                                 | BCRP                                                      | 83      | 84      |
| Ciprofloxacin               | 92  |                                                   |                                 | BCRP                                                      |         | 85      |
| Clindamycin                 | 100 | CYP3A4/5 ( <b>major</b> )                         |                                 |                                                           | 86      |         |
| <b>Cardiovascular drugs</b> |     |                                                   |                                 |                                                           |         |         |
| Amlodipine                  | 3   | CYP3A4/5                                          |                                 |                                                           | 87      |         |
| Ramipril*                   | 11  | CES1                                              |                                 |                                                           | 88,89   |         |
| Losartan                    | 14  | CYP3A4/5, CYP2C9                                  |                                 | P-gp                                                      | 90      | 91      |
| Metoprolol                  | 16  | CYP3A4/5, CYP2C9, CYP2B6, CYP2D6 ( <b>major</b> ) |                                 |                                                           | 92,93   |         |
| Bisoprolol                  | 20  | CYP3A4/5 ( <b>major</b> ), CYP2D6                 |                                 | P-gp                                                      | 94      | 95      |
| Candesartan cilexetil*      | 26  | CYP2C9                                            |                                 | P-gp, OAT4                                                | 96,97   | 98,99   |
| Perindopril*                | 32  | CES1                                              |                                 |                                                           | 100,101 |         |
| Enalapril*                  | 39  | CES1                                              |                                 | OATP1B1, OATP1B3, MRP2                                    | 88,102  | 103     |
| Atenolol                    | 44  |                                                   |                                 | P-gp, MATE1, MATE2-K, OCT1, OCT2                          |         | 104,105 |
| Irbesartan                  | 54  | CYP2C9                                            |                                 | OATP1B1                                                   | 106     | 107     |
| Lisinopril                  | 57  |                                                   |                                 |                                                           |         |         |
| Telmisartan                 | 59  |                                                   | UGT1A3 ( <b>major</b> ), UGT1A9 | OATP1B3                                                   | 108     | 109     |
| Propranolol                 | 68  | CYP1A2, CYP2D6                                    | UGT1A9, UGT2B4, UGT2B7          | P-gp                                                      | 110,111 | 112     |
| Lercanidipine               | 70  | CYP3A4/5                                          |                                 |                                                           | 113     |         |
| Felodipine                  | 76  | CYP3A4/5                                          |                                 |                                                           | 114     |         |
| Valsartan                   | 80  | CYP2C9                                            |                                 | OAT1, OAT3, OAT4, OATP1B1, OATP1B3 ( <b>major</b> ), MRP2 | 115     | 99,116  |

|                                   |    |                                                                  |                                    |                                                                                 |             |         |
|-----------------------------------|----|------------------------------------------------------------------|------------------------------------|---------------------------------------------------------------------------------|-------------|---------|
| Doxazosin                         | 98 | CYP3A4/5 ( <b>major</b> ),<br>CYP2C19, CYP2D6                    |                                    |                                                                                 | 117         |         |
| <b>Cholesterol-lowering drugs</b> |    |                                                                  |                                    |                                                                                 |             |         |
| Atorvastatin                      | 2  | CYP3A4/5                                                         | UGT1A1, UGT1A3                     | P-gp, OATP1B1,<br>OATP1B3,<br>OATP2B1, MCT                                      | 118,119     | 120,121 |
| Simvastatin*                      | 5  | CYP3A4/5                                                         | UGT1A1, UGT1A3                     | OATP1B1, OATP1B3                                                                | 119,122,123 | 124     |
| Rosuvastatin                      | 24 | CYP2C9, CYP2C19                                                  |                                    | P-gp, BCRP, OAT3,<br>OATP1A2,<br>OATP1B1,<br>OATP1B3,<br>OATP2B1, MRP2,<br>NTCP | 125         | 126-128 |
| Ezetimibe                         | 63 |                                                                  | UGT2B15, UGT2B7,<br>UGT1A3, UGT1A1 | P-gp, MRP2                                                                      | 129         | 130,131 |
| <b>Hormones</b>                   |    |                                                                  |                                    |                                                                                 |             |         |
| Levothyroxine sodium              | 6  |                                                                  |                                    |                                                                                 |             |         |
| Ethinylestradiol                  | 27 | CYP3A4/5 ( <b>major</b> ),<br>CYP2C9, CYP2C8,<br>CYP2C19, CYP1A2 | SULT1A1, UGT1A1                    |                                                                                 | 132-134     |         |
| Levonogestrel                     | 41 |                                                                  |                                    |                                                                                 |             |         |
| Estradiol                         | 42 | CYP3A4/5, CYP1A2,<br>CYP1A1, CYP1B1                              |                                    |                                                                                 | 135         |         |
| Desogestrel*                      | 62 |                                                                  | SULT                               |                                                                                 | 136,137     |         |
| <b>Corticosteroids</b>            |    |                                                                  |                                    |                                                                                 |             |         |
| Prednisolone                      | 17 |                                                                  |                                    |                                                                                 |             |         |
| Dexamethasone                     | 60 | CYP3A4/5, CES2                                                   |                                    | P-gp                                                                            | 138         | 139     |
| <b>Diuretics</b>                  |    |                                                                  |                                    |                                                                                 |             |         |
| Furosemide                        | 23 |                                                                  | UGT1A9                             | BCRP, OAT1, OAT3,<br>OATP1B1,                                                   | 140         | 141,142 |

|                      |    |                                                                                                |                                     |                                                                                  |         |         |
|----------------------|----|------------------------------------------------------------------------------------------------|-------------------------------------|----------------------------------------------------------------------------------|---------|---------|
|                      |    |                                                                                                |                                     | OATP1B3,<br>OATP2B1, MRP4                                                        |         |         |
| Bendroflumethiazide  | 31 |                                                                                                |                                     |                                                                                  |         |         |
| Spironolactone*      | 83 |                                                                                                |                                     |                                                                                  | 143     |         |
| Hydrochlorothiazide  | 96 |                                                                                                |                                     | BCRP, MATE2-K,<br>OAT1 ( <b>major</b> ), OAT3<br>( <b>major</b> ), OCT2,<br>MRP4 |         | 144,145 |
| <b>Sedatives</b>     |    |                                                                                                |                                     |                                                                                  |         |         |
| Zopiclone            | 28 | CYP3A4/5 ( <b>major</b> ),<br>CYP2C8                                                           |                                     |                                                                                  | 146     |         |
| Diazepam             | 43 | CYP3A4/5 ( <b>major</b> ),<br>CYP2C19, CYP2B6                                                  |                                     |                                                                                  | 147     |         |
| Oxazepam             | 58 |                                                                                                | UGT2B15, UGT1A9,<br>UGT2B7          |                                                                                  | 148     |         |
| Zolpidem             | 81 | CYP3A4/5 ( <b>major</b> ),<br>CYP2C9, CYP2C19,<br>CYP1A2, CYP2D6                               |                                     |                                                                                  | 149     |         |
| <b>Antihistamine</b> |    |                                                                                                |                                     |                                                                                  |         |         |
| Cetirizine           | 37 |                                                                                                |                                     | P-gp, MRP2                                                                       |         | 150     |
| Desloratadine        | 38 | CYP2C8                                                                                         | UGT2B15, UGT1A3,<br>UGT1A1, UGT2B10 | P-gp                                                                             | 151,152 | 153     |
| Ranitidine           | 71 | CYP2C19, CYP2D6,<br>CYP1A2, FMO3 ( <b>major</b> ),<br>FMO5 ( <b>major</b> )                    |                                     | P-gp, OCT1, OCT2                                                                 | 154     | 155,156 |
| Fexofenadine         | 84 |                                                                                                |                                     | P-gp, OATP1B1,<br>OATP1B3                                                        |         | 157,158 |
| Loratadine*          | 93 | CYP3A4/5 ( <b>major</b> ),<br>CYP2C9, CYP2C19,<br>CYP2C8, CYP2B6,<br>CYP1A2, CYP1A1,<br>CYP2D6 |                                     | P-gp                                                                             | 159,160 |         |
| <b>Urology</b>       |    |                                                                                                |                                     |                                                                                  |         |         |

|                                                                                                                                                                                                                                                                                                                                                                                                                                                                                                                                                                                                                                                                                                                                                                                                                                |    |                                              |        |                                                                  |     |         |
|--------------------------------------------------------------------------------------------------------------------------------------------------------------------------------------------------------------------------------------------------------------------------------------------------------------------------------------------------------------------------------------------------------------------------------------------------------------------------------------------------------------------------------------------------------------------------------------------------------------------------------------------------------------------------------------------------------------------------------------------------------------------------------------------------------------------------------|----|----------------------------------------------|--------|------------------------------------------------------------------|-----|---------|
| Tamsulosin                                                                                                                                                                                                                                                                                                                                                                                                                                                                                                                                                                                                                                                                                                                                                                                                                     | 49 | CYP3A4/5, CYP2D6                             |        |                                                                  | 161 |         |
| Sildenafil                                                                                                                                                                                                                                                                                                                                                                                                                                                                                                                                                                                                                                                                                                                                                                                                                     | 66 | CYP3A4/5 ( <b>major</b> ),<br>CYP2C9         |        | P-gp, BCRP                                                       | 162 | 163     |
| <b>Antimycotics</b>                                                                                                                                                                                                                                                                                                                                                                                                                                                                                                                                                                                                                                                                                                                                                                                                            |    |                                              |        |                                                                  |     |         |
| Fluconazole                                                                                                                                                                                                                                                                                                                                                                                                                                                                                                                                                                                                                                                                                                                                                                                                                    | 87 |                                              |        | P-gp                                                             |     | 164     |
| <b>Respiratory diseases</b>                                                                                                                                                                                                                                                                                                                                                                                                                                                                                                                                                                                                                                                                                                                                                                                                    |    |                                              |        |                                                                  |     |         |
| Montelukast                                                                                                                                                                                                                                                                                                                                                                                                                                                                                                                                                                                                                                                                                                                                                                                                                    | 91 | CYP3A4/5, CYP2C9,<br>CYP2C19, CYP2C8         | UGT1A3 |                                                                  | 165 |         |
| <b>Other</b>                                                                                                                                                                                                                                                                                                                                                                                                                                                                                                                                                                                                                                                                                                                                                                                                                   |    |                                              |        |                                                                  |     |         |
| Allopurinol*                                                                                                                                                                                                                                                                                                                                                                                                                                                                                                                                                                                                                                                                                                                                                                                                                   | 51 |                                              |        | BCRP, OAT2                                                       | 166 | 167,168 |
| Alendronic acid                                                                                                                                                                                                                                                                                                                                                                                                                                                                                                                                                                                                                                                                                                                                                                                                                | 56 |                                              |        |                                                                  |     |         |
| Isosorbide<br>mononitrate*                                                                                                                                                                                                                                                                                                                                                                                                                                                                                                                                                                                                                                                                                                                                                                                                     | 74 |                                              |        |                                                                  | 169 |         |
| Sumatriptan                                                                                                                                                                                                                                                                                                                                                                                                                                                                                                                                                                                                                                                                                                                                                                                                                    | 79 | MAO-A                                        |        | OCT1                                                             | 170 | 171     |
| Metoclopramide                                                                                                                                                                                                                                                                                                                                                                                                                                                                                                                                                                                                                                                                                                                                                                                                                 | 90 | CYP3A4/5, CYP1A2,<br>CYP2D6 ( <b>major</b> ) |        | P-gp                                                             | 172 | 173     |
| Methotrexate                                                                                                                                                                                                                                                                                                                                                                                                                                                                                                                                                                                                                                                                                                                                                                                                                   | 94 | AO                                           |        | P-gp, OATP1B1,<br>OATP1B3,<br>OATP1A2, MRP1,<br>MRP2, MRP3, MRP4 | 174 | 175-179 |
| Finasteride                                                                                                                                                                                                                                                                                                                                                                                                                                                                                                                                                                                                                                                                                                                                                                                                                    | 95 | CYP3A4/5                                     |        |                                                                  | 180 |         |
| Acetylcysteine*                                                                                                                                                                                                                                                                                                                                                                                                                                                                                                                                                                                                                                                                                                                                                                                                                | 97 |                                              |        | AE1                                                              | 181 | 182     |
| Methylphenidate                                                                                                                                                                                                                                                                                                                                                                                                                                                                                                                                                                                                                                                                                                                                                                                                                | 99 | CES1                                         |        |                                                                  | 183 |         |
| Abbreviation: AE: Anion exchange protein, AO: Aldehyde oxidase, BCRP: Breast Cancer Resistance Protein, CES: Carboxylesterase, CHT: Choline transporter, CYP: Cytochrome P450 enzyme, FMO: Flavin-containing monooxygenase, LAT: L-amino acid transporter, MAO: Monoamine oxidase, MCT: Monocarboxylate Transporter, MRP: Multidrug resistance-associated protein, NTCP: Sodium-taurocholate cotransporting polypeptide, OAT: Organic Anion transporter, OATP: Organic anion transporting polypeptide, OCT: Organic Cation Transporter, OCTN: Organic Cation Transporter Novel, PePT: Peptide transporter, PMAT: Plasma membrane monoamine transporter, P-gp: P-glycoprotein, SERT: Serotonin transporter, SULF: Sulfotransferases, THTR: Thiamin transporter protein, and UGT: Uridine 5'-diphospho-glucuronosyltransferases. |    |                                              |        |                                                                  |     |         |
| *: The drug is a prodrug                                                                                                                                                                                                                                                                                                                                                                                                                                                                                                                                                                                                                                                                                                                                                                                                       |    |                                              |        |                                                                  |     |         |

## References

1. Manyike PT, Kharasch ED, Kalthorn TF, Slattery JT. Contribution of CYP2E1 and CYP3A to acetaminophen reactive metabolite formation. *Clin Pharmacol Ther.* 2000;67(3):275-282. doi:10.1067/mcp.2000.104736
2. Court MH, Duan SX, von Moltke LL, et al. Interindividual variability in acetaminophen glucuronidation by human liver microsomes: identification of relevant acetaminophen UDP-glucuronosyltransferase isoforms. *J Pharmacol Exp Ther.* 2001;299(3):998-1006.
3. Adjei AA, Gaedigk A, Simon SD, Weinshilboum RM, Leeder JS. Interindividual variability in acetaminophen sulfation by human fetal liver: implications for pharmacogenetic investigations of drug-induced birth defects. *Birt Defects Res A Clin Mol Teratol.* 2008;82(3):155-165. doi:10.1002/bdra.20535
4. Mutlib AE, Goosen TC, Bauman JN, Williams JA, Kulkarni S, Kostrubsky S. Kinetics of acetaminophen glucuronidation by UDP-glucuronosyltransferases 1A1, 1A6, 1A9 and 2B15. Potential implications in acetaminophen-induced hepatotoxicity. *Chem Res Toxicol.* 2006;19(5):701-709. doi:10.1021/tx050317i
5. Caraco Y, Tateishi T, Guengerich FP, Wood AJ. Microsomal codeine N-demethylation: cosegregation with cytochrome P4503A4 activity. *Drug Metab Dispos Biol Fate Chem.* 1996;24(7):761-764.
6. Court MH, Krishnaswamy S, Hao Q, et al. Evaluation of 3'-azido-3'-deoxythymidine, morphine, and codeine as probe substrates for UDP-glucuronosyltransferase 2B7 (UGT2B7) in human liver microsomes: specificity and influence of the UGT2B7\*2 polymorphism. *Drug Metab Dispos Biol Fate Chem.* 2003;31(9):1125-1133. doi:10.1124/dmd.31.9.1125
7. Li Y, Argáez C. *Codeine for Pain Related to Osteoarthritis of the Knee and Hip: A Review of Clinical Effectiveness.* Canadian Agency for Drugs and Technologies in Health; 2020. Accessed July 15, 2022. <http://www.ncbi.nlm.nih.gov/books/NBK567270/>
8. Hamman MA, Thompson GA, Hall SD. Regioselective and stereoselective metabolism of ibuprofen by human cytochrome P450 2C. *Biochem Pharmacol.* 1997;54(1):33-41. doi:10.1016/s0006-2952(97)00143-3
9. Kuehl GE, Lampe JW, Potter JD, Bigler J. Glucuronidation of nonsteroidal anti-inflammatory drugs: identifying the enzymes responsible in human liver microsomes. *Drug Metab Dispos Biol Fate Chem.* 2005;33(7):1027-1035. doi:10.1124/dmd.104.002527
10. Khamdang S, Takeda M, Noshiro R, et al. Interactions of human organic anion transporters and human organic cation transporters with nonsteroidal anti-inflammatory drugs. *J Pharmacol Exp Ther.* 2002;303(2):534-539. doi:10.1124/jpet.102.037580
11. Tang M, Mukundan M, Yang J, et al. Antiplatelet agents aspirin and clopidogrel are hydrolyzed by distinct carboxylesterases, and clopidogrel is transesterificated in the presence of ethyl alcohol. *J Pharmacol Exp Ther.* 2006;319(3):1467-1476. doi:10.1124/jpet.106.110577
12. Scheit K, Bauer G. Direct and indirect inactivation of tumor cell protective catalase by salicylic acid and anthocyanidins reactivates intercellular ROS signaling and allows for synergistic effects. *Carcinogenesis.* 2015;36(3):400-411. doi:10.1093/carcin/bgv010
13. Subrahmanyam V, Renwick AB, Walters DG, et al. Identification of cytochrome P-450 isoforms responsible for cis-tramadol metabolism in human liver microsomes. *Drug Metab Dispos Biol Fate Chem.* 2001;29(8):1146-1155.
14. Teoli D, Thompson V, Wright J, et al. Acute Pain Crisis Caused by Tramadol Remdesivir Drug-Drug Interaction. *J Palliat Med.* 2021;24(10):1582-1584. doi:10.1089/jpm.2021.0123



15. Tzvetkov MV, Saadatmand AR, Lötsch J, Tegeder I, Stingl JC, Brockmöller J. Genetically polymorphic OCT1: another piece in the puzzle of the variable pharmacokinetics and pharmacodynamics of the opioidergic drug tramadol. *Clin Pharmacol Ther.* 2011;90(1):143-150. doi:10.1038/clpt.2011.56
16. Tracy TS, Marra C, Wrighton SA, Gonzalez FJ, Korzekwa KR. Involvement of multiple cytochrome P450 isoforms in naproxen O-demethylation. *Eur J Clin Pharmacol.* 1997;52(4):293-298. doi:10.1007/s002280050293
17. Choi JS, Jin MJ, Han HK. Role of monocarboxylic acid transporters in the cellular uptake of NSAIDs. *J Pharm Pharmacol.* 2005;57(9):1185-1189. doi:10.1211/jpp.57.9.0013
18. Lalovic B, Phillips B, Risler LL, Howald W, Shen DD. Quantitative contribution of CYP2D6 and CYP3A to oxycodone metabolism in human liver and intestinal microsomes. *Drug Metab Dispos Biol Fate Chem.* 2004;32(4):447-454. doi:10.1124/dmd.32.4.447
19. Bort R, Macé K, Boobis A, Gómez-Lechón MJ, Pfeifer A, Castell J. Hepatic metabolism of diclofenac: role of human CYP in the minor oxidative pathways. *Biochem Pharmacol.* 1999;58(5):787-796. doi:10.1016/s0006-2952(99)00167-7
20. King C, Tang W, Ngui J, Tephly T, Braun M. Characterization of rat and human UDP-glucuronosyltransferases responsible for the in vitro glucuronidation of diclofenac. *Toxicol Sci Off J Soc Toxicol.* 2001;61(1):49-53. doi:10.1093/toxsci/61.1.49
21. Shen S, Marchick MR, Davis MR, Doss GA, Pohl LR. Metabolic activation of diclofenac by human cytochrome P450 3A4: role of 5-hydroxydiclofenac. *Chem Res Toxicol.* 1999;12(2):214-222. doi:10.1021/tx9802365
22. Zhang Y, Han YH, Putluru SP, et al. Diclofenac and Its Acyl Glucuronide: Determination of In Vivo Exposure in Human Subjects and Characterization as Human Drug Transporter Substrates In Vitro. *Drug Metab Dispos Biol Fate Chem.* 2016;44(3):320-328. doi:10.1124/dmd.115.066944
23. Dickens D, Webb SD, Antonyuk S, et al. Transport of gabapentin by LAT1 (SLC7A5). *Biochem Pharmacol.* 2013;85(11):1672-1683. doi:10.1016/j.bcp.2013.03.022
24. Coffman BL, Rios GR, King CD, Tephly TR. Human UGT2B7 catalyzes morphine glucuronidation. *Drug Metab Dispos Biol Fate Chem.* 1997;25(1):1-4.
25. Mashayekhi SO, Sattari MR, Routledge PA. Evidence of active transport involvement in morphine transport via MDCKII and MDCK-PGP cell lines. *Res Pharm Sci.* 2010;5(2):99-106.
26. Tzvetkov MV, dos Santos Pereira JN, Meineke I, Saadatmand AR, Stingl JC, Brockmöller J. Morphine is a substrate of the organic cation transporter OCT1 and polymorphisms in OCT1 gene affect morphine pharmacokinetics after codeine administration. *Biochem Pharmacol.* 2013;86(5):666-678. doi:10.1016/j.bcp.2013.06.019
27. Takahashi Y, Nishimura T, Higuchi K, et al. Transport of Pregabalin Via L-Type Amino Acid Transporter 1 (SLC7A5) in Human Brain Capillary Endothelial Cell Line. *Pharm Res.* 2018;35(12):246. doi:10.1007/s11095-018-2532-0
28. Liu Z, Mortimer O, Smith CA, Wolf CR, Rane A. Evidence for a role of cytochrome P450 2D6 and 3A4 in ethylmorphine metabolism. *Br J Clin Pharmacol.* 1995;39(1):77-80. doi:10.1111/j.1365-2125.1995.tb04413.x
29. Wilcox RA, Owen H. Variable cytochrome P450 2D6 expression and metabolism of codeine and other opioid prodrugs: implications for the Australian anaesthetist. *Anaesth Intensive Care.* 2000;28(6):611-619. doi:10.1177/0310057X0002800602

30. Kirkwood LC, Nation RL, Somogyi AA. Characterization of the human cytochrome P450 enzymes involved in the metabolism of dihydrocodeine. *Br J Clin Pharmacol*. 1997;44(6):549-555. doi:10.1046/j.1365-2125.1997.t01-1-00626.x
31. Abelö A, Andersson TB, Antonsson M, Naudot AK, Skånberg I, Weidolf L. Stereoselective metabolism of omeprazole by human cytochrome P450 enzymes. *Drug Metab Dispos Biol Fate Chem*. 2000;28(8):966-972.
32. Shin JM, Kim N. Pharmacokinetics and pharmacodynamics of the proton pump inhibitors. *J Neurogastroenterol Motil*. 2013;19(1):25-35. doi:10.5056/jnm.2013.19.1.25
33. Pauli-Magnus C, Rekersbrink S, Klotz U, Fromm MF. Interaction of omeprazole, lansoprazole and pantoprazole with P-glycoprotein. *Naunyn Schmiedebergs Arch Pharmacol*. 2001;364(6):551-557. doi:10.1007/s00210-001-0489-7
34. PROTONIX (pantoprazole sodium) delayed-release tablets PROTONIX (pantoprazole sodium) for delayed-release oral suspension Initial U.S. approval: 2000. Published online March 1, 2012. [https://www.accessdata.fda.gov/drugsatfda\\_docs/label/2012/020987s0451bl.pdf](https://www.accessdata.fda.gov/drugsatfda_docs/label/2012/020987s0451bl.pdf)
35. Wang L, Leggas M, Empey PE, McNamara PJ. Stereoselective interaction of pantoprazole with ABCG2. II. In vitro flux analysis. *Drug Metab Dispos Biol Fate Chem*. 2012;40(5):1024-1031. doi:10.1124/dmd.111.041616
36. Naritomi Y, Terashita S, Kagayama A. Identification and relative contributions of human cytochrome P450 isoforms involved in the metabolism of glibenclamide and lansoprazole: evaluation of an approach based on the in vitro substrate disappearance rate. *Xenobiotica Fate Foreign Compd Biol Syst*. 2004;34(5):415-427. doi:10.1080/00498250410001685728
37. Kazui M, Nishiya Y, Ishizuka T, et al. Identification of the human cytochrome P450 enzymes involved in the two oxidative steps in the bioactivation of clopidogrel to its pharmacologically active metabolite. *Drug Metab Dispos Biol Fate Chem*. 2010;38(1):92-99. doi:10.1124/dmd.109.029132
38. Zhu HJ, Wang X, Gawronski BE, Brinda BJ, Angiolillo DJ, Markowitz JS. Carboxylesterase 1 as a determinant of clopidogrel metabolism and activation. *J Pharmacol Exp Ther*. 2013;344(3):665-672. doi:10.1124/jpet.112.201640
39. Sangkuhl K, Klein TE, Altman RB. Clopidogrel pathway. *Pharmacogenet Genomics*. 2010;20(7):463-465. doi:10.1097/FPC.0b013e3283385420
40. Li L, Song F, Tu M, et al. In vitro interaction of clopidogrel and its hydrolysate with OCT1, OCT2 and OAT1. *Int J Pharm*. 2014;465(1-2):5-10. doi:10.1016/j.ijpharm.2014.02.003
41. Taubert D, von Beckerath N, Grimberg G, et al. Impact of P-glycoprotein on clopidogrel absorption. *Clin Pharmacol Ther*. 2006;80(5):486-501. doi:10.1016/j.clpt.2006.07.007
42. COUMADIN (warfarin sodium) tablets, for oral use. [https://www.accessdata.fda.gov/drugsatfda\\_docs/label/2011/009218s1071bl.pdf](https://www.accessdata.fda.gov/drugsatfda_docs/label/2011/009218s1071bl.pdf)
43. Bi YA, Lin J, Mathialagan S, et al. Role of Hepatic Organic Anion Transporter 2 in the Pharmacokinetics of R- and S-Warfarin: In Vitro Studies and Mechanistic Evaluation. *Mol Pharm*. 2018;15(3):1284-1295. doi:10.1021/acs.molpharmaceut.7b01108
44. Wang L, Zhang D, Raghavan N, et al. In vitro assessment of metabolic drug-drug interaction potential of apixaban through cytochrome P450 phenotyping, inhibition, and induction studies. *Drug Metab Dispos Biol Fate Chem*. 2010;38(3):448-458. doi:10.1124/dmd.109.029694

45. Zhang D, He K, Herbst JJ, et al. Characterization of efflux transporters involved in distribution and disposition of apixaban. *Drug Metab Dispos Biol Fate Chem*. 2013;41(4):827-835. doi:10.1124/dmd.112.050260
46. CHMP ASSESSMENT REPORT FOR Xarelto. [https://www.ema.europa.eu/en/documents/assessment-report/xarelto-epar-public-assessment-report\\_en.pdf](https://www.ema.europa.eu/en/documents/assessment-report/xarelto-epar-public-assessment-report_en.pdf)
47. Gnoth MJ, Buetehorn U, Muenster U, Schwarz T, Sandmann S. In vitro and in vivo P-glycoprotein transport characteristics of rivaroxaban. *J Pharmacol Exp Ther*. 2011;338(1):372-380. doi:10.1124/jpet.111.180240
48. Kobayashi K, Ishizuka T, Shimada N, Yoshimura Y, Kamijima K, Chiba K. Sertraline N-demethylation is catalyzed by multiple isoforms of human cytochrome P-450 in vitro. *Drug Metab Dispos Biol Fate Chem*. 1999;27(7):763-766.
49. Wang JS, Zhu HJ, Gibson BB, Markowitz JS, Donovan JL, DeVane CL. Sertraline and its metabolite desmethylsertraline, but not bupropion or its three major metabolites, have high affinity for P-glycoprotein. *Biol Pharm Bull*. 2008;31(2):231-234. doi:10.1248/bpb.31.231
50. Weng Q, Liang B, Zhou Y, et al. Effect of 24 cytochrome P450 2D6 variants found in the Chinese population on the N-demethylation of amitriptyline in vitro. *Pharm Biol*. 2016;54(11):2475-2479. doi:10.3109/13880209.2016.1160250
51. Rochat B, Kosel M, Boss G, Testa B, Gillet M, Baumann P. Stereoselective biotransformation of the selective serotonin reuptake inhibitor citalopram and its demethylated metabolites by monoamine oxidases in human liver. *Biochem Pharmacol*. 1998;56(1):15-23. doi:10.1016/s0006-2952(98)00008-2
52. von Moltke LL, Greenblatt DJ, Grassi JM, et al. Citalopram and desmethylcitalopram in vitro: human cytochromes mediating transformation, and cytochrome inhibitory effects. *Biol Psychiatry*. 1999;46(6):839-849. doi:10.1016/s0006-3223(98)00353-9
53. REMERON® (mirtazapine) tablets, for oral use REMERONSOLTAB® (mirtazapine) orally disintegrating tablets Initial U.S. Approval: 1996. Published online April 3, 2020. [https://www.accessdata.fda.gov/drugsatfda\\_docs/label/2020/020415s029,%20021208s019lbl.pdf](https://www.accessdata.fda.gov/drugsatfda_docs/label/2020/020415s029,%20021208s019lbl.pdf)
54. von Moltke LL, Greenblatt DJ, Giancarlo GM, Granda BW, Harmatz JS, Shader RI. Escitalopram (S-citalopram) and its metabolites in vitro: cytochromes mediating biotransformation, inhibitory effects, and comparison to R-citalopram. *Drug Metab Dispos Biol Fate Chem*. 2001;29(8):1102-1109.
55. O'Brien FE, O'Connor RM, Clarke G, Dinan TG, Griffin BT, Cryan JF. P-glycoprotein inhibition increases the brain distribution and antidepressant-like activity of escitalopram in rodents. *Neuropsychopharmacol Off Publ Am Coll Neuropsychopharmacol*. 2013;38(11):2209-2219. doi:10.1038/npp.2013.120
56. Fogelman SM, Schmider J, Venkatakrishnan K, et al. O- and N-demethylation of venlafaxine in vitro by human liver microsomes and by microsomes from cDNA-transfected cells: effect of metabolic inhibitors and SSRI antidepressants. *Neuropsychopharmacol Off Publ Am Coll Neuropsychopharmacol*. 1999;20(5):480-490. doi:10.1016/S0893-133X(98)00113-4
57. Otton SV, Ball SE, Cheung SW, Inaba T, Rudolph RL, Sellers EM. Venlafaxine oxidation in vitro is catalysed by CYP2D6. *Br J Clin Pharmacol*. 1996;41(2):149-156. doi:10.1111/j.1365-2125.1996.tb00173.x
58. Ring BJ, Eckstein JA, Gillespie JS, Binkley SN, VandenBranden M, Wrighton SA. Identification of the human cytochromes p450 responsible for in vitro formation of R- and S-norfluoxetine. *J Pharmacol Exp Ther*. 2001;297(3):1044-1050.

59. Grimm SW, Richtand NM, Winter HR, Stams KR, Reece SB. Effects of cytochrome P450 3A modulators ketoconazole and carbamazepine on quetiapine pharmacokinetics. *Br J Clin Pharmacol*. 2006;61(1):58-69. doi:10.1111/j.1365-2125.2005.02507.x
60. Boulton DW, DeVane CL, Liston HL, Markowitz JS. In vitro P-glycoprotein affinity for atypical and conventional antipsychotics. *Life Sci*. 2002;71(2):163-169. doi:10.1016/s0024-3205(02)01680-6
61. Cymbalta (duloxetine hydrochloride) Delayed-Release Capsules for Oral Use. [https://www.accessdata.fda.gov/drugsatfda\\_docs/label/2010/022516lbl.pdf](https://www.accessdata.fda.gov/drugsatfda_docs/label/2010/022516lbl.pdf)
62. Rowland A, Elliot DJ, Williams JA, Mackenzie PI, Dickinson RG, Miners JO. In vitro characterization of lamotrigine N2-glucuronidation and the lamotrigine-valproic acid interaction. *Drug Metab Dispos Biol Fate Chem*. 2006;34(6):1055-1062. doi:10.1124/dmd.106.009340
63. Dickens D, Owen A, Alfirevic A, et al. Lamotrigine is a substrate for OCT1 in brain endothelial cells. *Biochem Pharmacol*. 2012;83(6):805-814. doi:10.1016/j.bcp.2011.12.032
64. Römermann K, Helmer R, Löscher W. The antiepileptic drug lamotrigine is a substrate of mouse and human breast cancer resistance protein (ABCG2). *Neuropharmacology*. 2015;93:7-14. doi:10.1016/j.neuropharm.2015.01.015
65. Luna-Tortós C, Fedrowitz M, Löscher W. Several major antiepileptic drugs are substrates for human P-glycoprotein. *Neuropharmacology*. 2008;55(8):1364-1375. doi:10.1016/j.neuropharm.2008.08.032
66. Tanihara Y, Masuda S, Sato T, Katsura T, Ogawa O, Inui KI. Substrate specificity of MATE1 and MATE2-K, human multidrug and toxin extrusions/H(+)-organic cation antiporters. *Biochem Pharmacol*. 2007;74(2):359-371. doi:10.1016/j.bcp.2007.04.010
67. Liang X, Chien HC, Yee SW, et al. Metformin Is a Substrate and Inhibitor of the Human Thiamine Transporter, THTR-2 (SLC19A3). *Mol Pharm*. 2015;12(12):4301-4310. doi:10.1021/acs.molpharmaceut.5b00501
68. Zhou M, Xia L, Wang J. Metformin transport by a newly cloned proton-stimulated organic cation transporter (plasma membrane monoamine transporter) expressed in human intestine. *Drug Metab Dispos Biol Fate Chem*. 2007;35(10):1956-1962. doi:10.1124/dmd.107.015495
69. Han TK, Proctor WR, Costales CL, Cai H, Everett RS, Thakker DR. Four cation-selective transporters contribute to apical uptake and accumulation of metformin in Caco-2 cell monolayers. *J Pharmacol Exp Ther*. 2015;352(3):519-528. doi:10.1124/jpet.114.220350
70. Kimura N, Masuda S, Tanihara Y, et al. Metformin is a superior substrate for renal organic cation transporter OCT2 rather than hepatic OCT1. *Drug Metab Pharmacokinet*. 2005;20(5):379-386. doi:10.2133/dmpk.20.379
71. Elliot DJ, Suharjono null, Lewis BC, et al. Identification of the human cytochromes P450 catalysing the rate-limiting pathways of gliclazide elimination. *Br J Clin Pharmacol*. 2007;64(4):450-457. doi:10.1111/j.1365-2125.2007.02943.x
72. Vincent SH, Reed JR, Bergman AJ, et al. Metabolism and excretion of the dipeptidyl peptidase 4 inhibitor [14C]sitagliptin in humans. *Drug Metab Dispos Biol Fate Chem*. 2007;35(4):533-538. doi:10.1124/dmd.106.013136
73. Chu XY, Bleasby K, Yabut J, et al. Transport of the dipeptidyl peptidase-4 inhibitor sitagliptin by human organic anion transporter 3, organic anion transporting polypeptide 4C1, and multidrug resistance P-glycoprotein. *J Pharmacol Exp Ther*. 2007;321(2):673-683. doi:10.1124/jpet.106.116517

74. Li M, Anderson GD, Phillips BR, Kong W, Shen DD, Wang J. Interactions of amoxicillin and cefaclor with human renal organic anion and peptide transporters. *Drug Metab Dispos Biol Fate Chem*. 2006;34(4):547-555. doi:10.1124/dmd.105.006791
75. Jansåker F, Frimodt-Møller N, Benfield TL, Knudsen JD. Mecillinam for the treatment of acute pyelonephritis and bacteremia caused by Enterobacteriaceae: a literature review. *Infect Drug Resist*. 2018;11:761-771. doi:10.2147/IDR.S163280
76. Goldman JL, Leeder JS, Van Haandel L, Pearce RE. In Vitro Hepatic Oxidative Biotransformation of Trimethoprim. *Drug Metab Dispos Biol Fate Chem*. 2015;43(9):1372-1380. doi:10.1124/dmd.115.065193
77. Kito T, Ito S, Mizuno T, Maeda K, Kusuhara H. Investigation of non-linear Mate1-mediated efflux of trimethoprim in the mouse kidney as the mechanism underlying drug-drug interactions between trimethoprim and organic cations in the kidney. *Drug Metab Pharmacokinet*. 2019;34(1):87-94. doi:10.1016/j.dmpk.2018.08.005
78. Dekker SJ, Dohmen F, Vermeulen NPE, Commandeur JNM. Characterization of kinetics of human cytochrome P450s involved in bioactivation of flucloxacillin: inhibition of CYP3A-catalysed hydroxylation by sulfaphenazole. *Br J Pharmacol*. 2019;176(3):466-477. doi:10.1111/bph.14548
79. Watanabe K, Terada K, Jinriki T, Sato J. Effect of insulin on cephalixin uptake and transepithelial transport in the human intestinal cell line Caco-2. *Eur J Pharm Sci Off J Eur Fed Pharm Sci*. 2004;21(1):87-95. doi:10.1016/j.ejps.2003.10.002
80. Pearce RE, Cohen-Wolkowicz M, Sampson MR, Kearns GL. The role of human cytochrome P450 enzymes in the formation of 2-hydroxymetronidazole: CYP2A6 is the high affinity (low Km) catalyst. *Drug Metab Dispos Biol Fate Chem*. 2013;41(9):1686-1694. doi:10.1124/dmd.113.052548
81. Dingsdag SA, Hunter N. Metronidazole: an update on metabolism, structure-cytotoxicity and resistance mechanisms. *J Antimicrob Chemother*. 2018;73(2):265-279. doi:10.1093/jac/dkx351
82. Susanto M, Benet LZ. Can the enhanced renal clearance of antibiotics in cystic fibrosis patients be explained by P-glycoprotein transport? *Pharm Res*. 2002;19(4):457-462. doi:10.1023/a:1015191511817
83. Fleck LE, North EJ, Lee RE, Mulcahy LR, Casadei G, Lewis K. A screen for and validation of prodrug antimicrobials. *Antimicrob Agents Chemother*. 2014;58(3):1410-1419. doi:10.1128/AAC.02136-13
84. Merino G, Jonker JW, Wagenaar E, van Herwaarden AE, Schinkel AH. The breast cancer resistance protein (BCRP/ABCG2) affects pharmacokinetics, hepatobiliary excretion, and milk secretion of the antibiotic nitrofurantoin. *Mol Pharmacol*. 2005;67(5):1758-1764. doi:10.1124/mol.104.010439
85. Haslam IS, Wright JA, O'Reilly DA, Sherlock DJ, Coleman T, Simmons NL. Intestinal ciprofloxacin efflux: the role of breast cancer resistance protein (ABCG2). *Drug Metab Dispos Biol Fate Chem*. 2011;39(12):2321-2328. doi:10.1124/dmd.111.038323
86. Wynalda MA, Hutzler JM, Koets MD, Podoll T, Wienkers LC. In vitro metabolism of clindamycin in human liver and intestinal microsomes. *Drug Metab Dispos Biol Fate Chem*. 2003;31(7):878-887. doi:10.1124/dmd.31.7.878
87. Zhu Y, Wang F, Li Q, et al. Amlodipine metabolism in human liver microsomes and roles of CYP3A4/5 in the dihydropyridine dehydrogenation. *Drug Metab Dispos Biol Fate Chem*. 2014;42(2):245-249. doi:10.1124/dmd.113.055400
88. Thomsen R, Rasmussen HB, Linnet K, INDICES Consortium. In vitro drug metabolism by human carboxylesterase 1: focus on angiotensin-converting enzyme inhibitors. *Drug Metab Dispos Biol Fate Chem*. 2014;42(1):126-133. doi:10.1124/dmd.113.053512

89. van Griensven JM, Schoemaker RC, Cohen AF, Luus HG, Seibert-Grafe M, Röthig HJ. Pharmacokinetics, pharmacodynamics and bioavailability of the ACE inhibitor ramipril. *Eur J Clin Pharmacol.* 1995;47(6):513-518. doi:10.1007/BF00193704
90. Stearns RA, Chakravarty PK, Chen R, Chiu SH. Biotransformation of losartan to its active carboxylic acid metabolite in human liver microsomes. Role of cytochrome P4502C and 3A subfamily members. *Drug Metab Dispos Biol Fate Chem.* 1995;23(2):207-215.
91. Soldner A, Benet LZ, Mutschler E, Christians U. Active transport of the angiotensin-II antagonist losartan and its main metabolite EXP 3174 across MDCK-MDR1 and caco-2 cell monolayers. *Br J Pharmacol.* 2000;129(6):1235-1243. doi:10.1038/sj.bjp.0703150
92. Berger B, Bachmann F, Duthaler U, Krähenbühl S, Haschke M. Cytochrome P450 Enzymes Involved in Metoprolol Metabolism and Use of Metoprolol as a CYP2D6 Phenotyping Probe Drug. *Front Pharmacol.* 2018;9:774. doi:10.3389/fphar.2018.00774
93. Yang Q, Sun J, Li C, et al. Comparative research on the metabolism of metoprolol by four CYP2D6 allelic variants in vitro with LC-MS/MS. *J Pharm Biomed Anal.* 2019;174:479-485. doi:10.1016/j.jpba.2019.06.016
94. Horikiri Y, Suzuki T, Mizobe M. Stereoselective metabolism of bisoprolol enantiomers in dogs and humans. *Life Sci.* 1998;63(13):1097-1108. doi:10.1016/s0024-3205(98)00371-3
95. Bachmakov I, Werner U, Endress B, Auge D, Fromm MF. Characterization of beta-adrenoceptor antagonists as substrates and inhibitors of the drug transporter P-glycoprotein. *Fundam Clin Pharmacol.* 2006;20(3):273-282. doi:10.1111/j.1472-8206.2006.00408.x
96. Hanatani T, Fukuda T, Ikeda M, et al. CYP2C9\*3 influences the metabolism and the drug-interaction of candesartan in vitro. *Pharmacogenomics J.* 2001;1(4):288-292. doi:10.1038/sj.tpj.6500063
97. Jung EH, Cho CK, Kang P, et al. Physiologically based pharmacokinetic modeling of candesartan related to CYP2C9 genetic polymorphism in adult and pediatric patients. *Arch Pharm Res.* 2021;44(12):1109-1119. doi:10.1007/s12272-021-01363-1
98. Zhou L, Chen X, Gu Y, Liang J. Transport characteristics of candesartan in human intestinal Caco-2 cell line. *Biopharm Drug Dispos.* 2009;30(5):259-264. doi:10.1002/bdd.664
99. Noguchi S, Okochi M, Atsuta H, et al. Substrate recognition of renally eliminated angiotensin II receptor blockers by organic anion transporter 4. *Drug Metab Pharmacokinet.* 2021;36:100363. doi:10.1016/j.dmpk.2020.10.002
100. Wang X, Wang G, Shi J, et al. CES1 genetic variation affects the activation of angiotensin-converting enzyme inhibitors. *Pharmacogenomics J.* 2016;16(3):220-230. doi:10.1038/tpj.2015.42
101. Tsai HH, Lees KR, Howden CW, Reid JL. The pharmacokinetics and pharmacodynamics of perindopril in patients with hepatic cirrhosis. *Br J Clin Pharmacol.* 1989;28(1):53-59. doi:10.1111/j.1365-2125.1989.tb03505.x
102. Verbeeck RK, Kanfer I, Löbenberg R, et al. Biowaiver Monographs for Immediate-Release Solid Oral Dosage Forms: Enalapril. *J Pharm Sci.* 2017;106(8):1933-1943. doi:10.1016/j.xphs.2017.04.019
103. Liu L, Cui Y, Chung AY, et al. Vectorial transport of enalapril by Oatp1a1/Mrp2 and OATP1B1 and OATP1B3/MRP2 in rat and human livers. *J Pharmacol Exp Ther.* 2006;318(1):395-402. doi:10.1124/jpet.106.103390

104. Saaby L, Helms HCC, Brodin B. IPEC-J2 MDR1, a Novel High-Resistance Cell Line with Functional Expression of Human P-glycoprotein (ABCB1) for Drug Screening Studies. *Mol Pharm*. 2016;13(2):640-652. doi:10.1021/acs.molpharmaceut.5b00874
105. Yin J, Duan H, Shirasaka Y, Prasad B, Wang J. Atenolol Renal Secretion Is Mediated by Human Organic Cation Transporter 2 and Multidrug and Toxin Extrusion Proteins. *Drug Metab Dispos Biol Fate Chem*. 2015;43(12):1872-1881. doi:10.1124/dmd.115.066175
106. Bourrié M, Meunier V, Berger Y, Fabre G. Role of cytochrome P-450C9 in irbesartan oxidation by human liver microsomes. *Drug Metab Dispos Biol Fate Chem*. 1999;27(2):288-296.
107. Izumi S, Nozaki Y, Kusuhara H, et al. Relative Activity Factor (RAF)-Based Scaling of Uptake Clearance Mediated by Organic Anion Transporting Polypeptide (OATP) 1B1 and OATP1B3 in Human Hepatocytes. *Mol Pharm*. 2018;15(6):2277-2288. doi:10.1021/acs.molpharmaceut.8b00138
108. Busse D, Leandersson S, Amberntsson S, Darnell M, Hilgendorf C. Industrial Approach to Determine the Relative Contribution of Seven Major UGT Isoforms to Hepatic Glucuronidation. *J Pharm Sci*. 2020;109(7):2309-2320. doi:10.1016/j.xphs.2020.03.013
109. Ishiguro N, Maeda K, Kishimoto W, et al. Predominant contribution of OATP1B3 to the hepatic uptake of telmisartan, an angiotensin II receptor antagonist, in humans. *Drug Metab Dispos Biol Fate Chem*. 2006;34(7):1109-1115. doi:10.1124/dmd.105.009175
110. Yoshimoto K, Echizen H, Chiba K, Tani M, Ishizaki T. Identification of human CYP isoforms involved in the metabolism of propranolol enantiomers--N-desisopropylation is mediated mainly by CYP1A2. *Br J Clin Pharmacol*. 1995;39(4):421-431. doi:10.1111/j.1365-2125.1995.tb04472.x
111. Hanioka N, Hayashi K, Shimizudani T, et al. Stereoselective glucuronidation of propranolol in human and cynomolgus monkey liver microsomes: role of human hepatic UDP-glucuronosyltransferase isoforms, UGT1A9, UGT2B4 and UGT2B7. *Pharmacology*. 2008;82(4):293-303. doi:10.1159/000165100
112. Wang Y, Cao J, Wang X, Zeng S. Stereoselective transport and uptake of propranolol across human intestinal Caco-2 cell monolayers. *Chirality*. 2010;22(3):361-368. doi:10.1002/chir.20753
113. EMA. Summary of product characteristics, Lercanidipine. [https://mri.cts-mrp.eu/Human/Downloads/NL\\_H\\_5190\\_002\\_FinalPI.pdf](https://mri.cts-mrp.eu/Human/Downloads/NL_H_5190_002_FinalPI.pdf)
114. Fasinu P, Choonara YE, Kumar P, et al. Enhancement of the Oral Bioavailability of Felodipine Employing 8-Arm-Poly(Ethylene Glycol): In Vivo, In Vitro and In Silico Evaluation. *AAPS PharmSciTech*. 2017;18(3):617-628. doi:10.1208/s12249-016-0545-8
115. Nakashima A, Kawashita H, Masuda N, et al. Identification of cytochrome P450 forms involved in the 4-hydroxylation of valsartan, a potent and specific angiotensin II receptor antagonist, in human liver microsomes. *Xenobiotica Fate Foreign Compd Biol Syst*. 2005;35(6):589-602. doi:10.1080/00498250500158175
116. Hanna I, Alexander N, Crouthamel MH, et al. Transport properties of valsartan, sacubitril and its active metabolite (LBQ657) as determinants of disposition. *Xenobiotica Fate Foreign Compd Biol Syst*. 2018;48(3):300-313. doi:10.1080/00498254.2017.1295171
117. CARDURA® XL (doxazosin mesylate extended release tablets). Published online July 1, 2019. [https://www.accessdata.fda.gov/drugsatfda\\_docs/label/2010/021269s011lbl.pdf](https://www.accessdata.fda.gov/drugsatfda_docs/label/2010/021269s011lbl.pdf)

118. Jacobsen W, Kuhn B, Soldner A, et al. Lactonization is the critical first step in the disposition of the 3-hydroxy-3-methylglutaryl-CoA reductase inhibitor atorvastatin. *Drug Metab Dispos Biol Fate Chem.* 2000;28(11):1369-1378.
119. Prueksaritanont T, Subramanian R, Fang X, et al. Glucuronidation of statins in animals and humans: a novel mechanism of statin lactonization. *Drug Metab Dispos Biol Fate Chem.* 2002;30(5):505-512. doi:10.1124/dmd.30.5.505
120. Wu X, Whitfield LR, Stewart BH. Atorvastatin transport in the Caco-2 cell model: contributions of P-glycoprotein and the proton-monocarboxylic acid co-transporter. *Pharm Res.* 2000;17(2):209-215. doi:10.1023/a:1007525616017
121. Vildhede A, Karlgren M, Svedberg EK, et al. Hepatic uptake of atorvastatin: influence of variability in transporter expression on uptake clearance and drug-drug interactions. *Drug Metab Dispos Biol Fate Chem.* 2014;42(7):1210-1218. doi:10.1124/dmd.113.056309
122. Prueksaritanont T, Gorham LM, Ma B, et al. In vitro metabolism of simvastatin in humans [SBT]identification of metabolizing enzymes and effect of the drug on hepatic P450s. *Drug Metab Dispos Biol Fate Chem.* 1997;25(10):1191-1199.
123. Geboers S, Stappaerts J, Tack J, Annaert P, Augustijns P. In vitro and in vivo investigation of the gastrointestinal behavior of simvastatin. *Int J Pharm.* 2016;510(1):296-303. doi:10.1016/j.ijpharm.2016.06.048
124. Kunze A, Huwyler J, Camenisch G, Poller B. Prediction of organic anion-transporting polypeptide 1B1- and 1B3-mediated hepatic uptake of statins based on transporter protein expression and activity data. *Drug Metab Dispos Biol Fate Chem.* 2014;42(9):1514-1521. doi:10.1124/dmd.114.058412
125. McCormick AD, Dane AL, Schneck DW, Warwick MJ. ZD4522— an HMG-CoA reductase inhibitor free of metabolically mediated drug interactions: metabolic studies in human in vitro systems. *J Clin Pharmacol.* Published online 2000.
126. Kitamura S, Maeda K, Wang Y, Sugiyama Y. Involvement of multiple transporters in the hepatobiliary transport of rosuvastatin. *Drug Metab Dispos Biol Fate Chem.* 2008;36(10):2014-2023. doi:10.1124/dmd.108.021410
127. Ho RH, Tirona RG, Leake BF, et al. Drug and bile acid transporters in rosuvastatin hepatic uptake: function, expression, and pharmacogenetics. *Gastroenterology.* 2006;130(6):1793-1806. doi:10.1053/j.gastro.2006.02.034
128. Watanabe T, Kusuhara H, Watanabe T, et al. Prediction of the overall renal tubular secretion and hepatic clearance of anionic drugs and a renal drug-drug interaction involving organic anion transporter 3 in humans by in vitro uptake experiments. *Drug Metab Dispos Biol Fate Chem.* 2011;39(6):1031-1038. doi:10.1124/dmd.110.036129
129. Ghosal A, Hapangama N, Yuan Y, et al. Identification of human UDP-glucuronosyltransferase enzyme(s) responsible for the glucuronidation of ezetimibe (Zetia). *Drug Metab Dispos Biol Fate Chem.* 2004;32(3):314-320. doi:10.1124/dmd.32.3.314
130. Fahrmayr C, König J, Auge D, Mieth M, Fromm MF. Identification of drugs and drug metabolites as substrates of multidrug resistance protein 2 (MRP2) using triple-transfected MDCK-OATP1B1-UGT1A1-MRP2 cells. *Br J Pharmacol.* 2012;165(6):1836-1847. doi:10.1111/j.1476-5381.2011.01672.x
131. Oswald S, Haenisch S, Fricke C, et al. Intestinal expression of P-glycoprotein (ABCB1), multidrug resistance associated protein 2 (ABCC2), and uridine diphosphate-glucuronosyltransferase 1A1 predicts the disposition and modulates the effects of the cholesterol absorption inhibitor ezetimibe in humans. *Clin Pharmacol Ther.* 2006;79(3):206-217. doi:10.1016/j.clpt.2005.11.004
132. Wang B, Sanchez RI, Franklin RB, Evans DC, Huskey SEW. The involvement of CYP3A4 and CYP2C9 in the metabolism of 17 alpha-ethinylestradiol. *Drug Metab Dispos Biol Fate Chem.* 2004;32(11):1209-1212. doi:10.1124/dmd.104.000182



133. Yasuda S, Suiko M, Liu MC. Oral contraceptives as substrates and inhibitors for human cytosolic SULTs. *J Biochem (Tokyo)*. 2005;137(3):401-406. doi:10.1093/jb/mvi047
134. Vallée M, Albert C, Beaudry G, Hum DW, Bélanger A. Isolation and characterization of the monkey UDP-glucuronosyltransferase cDNA clone monUGT1A01 active on bilirubin and estrogens. *J Steroid Biochem Mol Biol*. 2001;77(4-5):239-249. doi:10.1016/s0960-0760(01)00062-0
135. Lee AJ, Cai MX, Thomas PE, Conney AH, Zhu BT. Characterization of the oxidative metabolites of 17beta-estradiol and estrone formed by 15 selectively expressed human cytochrome p450 isoforms. *Endocrinology*. 2003;144(8):3382-3398. doi:10.1210/en.2003-0192
136. Madden S, Back DJ, Martin CA, Orme ML. Metabolism of the contraceptive steroid desogestrel by the intestinal mucosa. *Br J Clin Pharmacol*. 1989;27(3):295-299. doi:10.1111/j.1365-2125.1989.tb05368.x
137. Schindler AE, Campagnoli C, Druckmann R, et al. Classification and pharmacology of progestins. *Maturitas*. 2003;46 Suppl 1:S7-S16. doi:10.1016/j.maturitas.2003.09.014
138. Sasagawa T, Yamada T, Nakagawa T, et al. In vitro metabolism of dexamethasone cipeclate, a novel synthetic corticosteroid, in human liver and nasal mucosa. *Xenobiotica Fate Foreign Compd Biol Syst*. 2011;41(10):874-884. doi:10.3109/00498254.2011.582894
139. Peng R, Zhang H, Zhang Y, Wei DY. Impacts of ABCB1 (G1199A) polymorphism on resistance, uptake, and efflux to steroid drugs. *Xenobiotica Fate Foreign Compd Biol Syst*. 2016;46(10):948-952. doi:10.3109/00498254.2016.1138249
140. Kerdpin O, Knights KM, Elliot DJ, Miners JO. In vitro characterisation of human renal and hepatic frusemide glucuronidation and identification of the UDP-glucuronosyltransferase enzymes involved in this pathway. *Biochem Pharmacol*. 2008;76(2):249-257. doi:10.1016/j.bcp.2008.04.014
141. Ebner T, Ishiguro N, Taub ME. The Use of Transporter Probe Drug Cocktails for the Assessment of Transporter-Based Drug-Drug Interactions in a Clinical Setting-Proposal of a Four Component Transporter Cocktail. *J Pharm Sci*. 2015;104(9):3220-3228. doi:10.1002/jps.24489
142. Chapa R, Li CY, Basit A, et al. Contribution of Uptake and Efflux Transporters to Oral Pharmacokinetics of Furosemide. *ACS Omega*. 2020;5(51):32939-32950. doi:10.1021/acsomega.0c03930
143. Avataneo V, De Nicolò A, Rabbia F, et al. A simple UHPLC-PDA method with a fast dilute-and-shot sample preparation for the quantification of canrenone and its prodrug spironolactone in human urine samples. *J Pharmacol Toxicol Methods*. 2018;94(Pt 2):29-35. doi:10.1016/j.vascn.2018.08.003
144. Yin J, Wagner DJ, Prasad B, Isoherranen N, Thummel KE, Wang J. Renal secretion of hydrochlorothiazide involves organic anion transporter 1/3, organic cation transporter 2, and multidrug and toxin extrusion protein 2-K. *Am J Physiol Renal Physiol*. 2019;317(4):F805-F814. doi:10.1152/ajprenal.00141.2019
145. Hasegawa M, Kusuhara H, Adachi M, Schuetz JD, Takeuchi K, Sugiyama Y. Multidrug resistance-associated protein 4 is involved in the urinary excretion of hydrochlorothiazide and furosemide. *J Am Soc Nephrol JASN*. 2007;18(1):37-45. doi:10.1681/ASN.2005090966
146. Becquemont L, Mouajjah S, Escaffre O, Beaune P, Funck-Brentano C, Jaillon P. Cytochrome P-450 3A4 and 2C8 are

involved in zopiclone metabolism. *Drug Metab Dispos Biol Fate Chem.* 1999;27(9):1068-1073.

147. Niwa T, Shiraga T, Ishii I, Kagayama A, Takagi A. Contribution of human hepatic cytochrome p450 isoforms to the metabolism of psychotropic drugs. *Biol Pharm Bull.* 2005;28(9):1711-1716. doi:10.1248/bpb.28.1711

148. Court MH, Duan SX, Guillemette C, et al. Stereoselective conjugation of oxazepam by human UDP-glucuronosyltransferases (UGTs): S-oxazepam is glucuronidated by UGT2B15, while R-oxazepam is glucuronidated by UGT2B7 and UGT1A9. *Drug Metab Dispos Biol Fate Chem.* 2002;30(11):1257-1265. doi:10.1124/dmd.30.11.1257

149. Von Moltke LL, Greenblatt DJ, Granda BW, et al. Zolpidem metabolism in vitro: responsible cytochromes, chemical inhibitors, and in vivo correlations. *Br J Clin Pharmacol.* 1999;48(1):89-97. doi:10.1046/j.1365-2125.1999.00953.x

150. He Y, Liu Y, Zeng S. Stereoselective and multiple carrier-mediated transport of cetirizine across Caco-2 cell monolayers with potential drug interaction. *Chirality.* 2010;22(7):684-692. doi:10.1002/chir.20815

151. Ghosal A, Yuan Y, Hapangama N, et al. Identification of human UDP-glucuronosyltransferase enzyme(s) responsible for the glucuronidation of 3-hydroxydesloratadine. *Biopharm Drug Dispos.* 2004;25(6):243-252. doi:10.1002/bdd.405

152. Kazmi F, Barbara JE, Yerino P, Parkinson A. A long-standing mystery solved: the formation of 3-hydroxydesloratadine is catalyzed by CYP2C8 but prior glucuronidation of desloratadine by UDP-glucuronosyltransferase 2B10 is an obligatory requirement. *Drug Metab Dispos Biol Fate Chem.* 2015;43(4):523-533. doi:10.1124/dmd.114.062620

153. Chen C, Hanson E, Watson JW, Lee JS. P-glycoprotein limits the brain penetration of nonsedating but not sedating H1-antagonists. *Drug Metab Dispos Biol Fate Chem.* 2003;31(3):312-318. doi:10.1124/dmd.31.3.312

154. Chung WG, Park CS, Roh HK, Lee WK, Cha YN. Oxidation of ranitidine by isozymes of flavin-containing monooxygenase and cytochrome P450. *Jpn J Pharmacol.* 2000;84(2):213-220. doi:10.1254/jjp.84.213

155. Meyer MJ, Seitz T, Brockmüller J, Tzvetkov MV. Effects of genetic polymorphisms on the OCT1 and OCT2-mediated uptake of ranitidine. *PLoS One.* 2017;12(12):e0189521. doi:10.1371/journal.pone.0189521

156. Collett A, Higgs NB, Sims E, Rowland M, Warhurst G. Modulation of the permeability of H2 receptor antagonists cimetidine and ranitidine by P-glycoprotein in rat intestine and the human colonic cell line Caco-2. *J Pharmacol Exp Ther.* 1999;288(1):171-178.

157. Cvetkovic M, Leake B, Fromm MF, Wilkinson GR, Kim RB. OATP and P-glycoprotein transporters mediate the cellular uptake and excretion of fexofenadine. *Drug Metab Dispos Biol Fate Chem.* 1999;27(8):866-871.

158. Matsushima S, Maeda K, Ishiguro N, Igarashi T, Sugiyama Y. Investigation of the inhibitory effects of various drugs on the hepatic uptake of fexofenadine in humans. *Drug Metab Dispos Biol Fate Chem.* 2008;36(4):663-669. doi:10.1124/dmd.107.017814

159. Ghosal A, Gupta S, Ramanathan R, et al. Metabolism of loratadine and further characterization of its in vitro metabolites. *Drug Metab Lett.* 2009;3(3):162-170. doi:10.2174/187231209789352067

160. Ortiz de Montellano PR. Cytochrome P450-activated prodrugs. *Future Med Chem.* 2013;5(2):213-228. doi:10.4155/fmc.12.197

161. Kamimura H, Oishi S, Matsushima H, et al. Identification of cytochrome P450 isozymes involved in metabolism of the alpha1-adrenoceptor blocker tamsulosin in human liver microsomes. *Xenobiotica Fate Foreign Compd Biol Syst.* 1998;28(10):909-922. doi:10.1080/004982598238985

162. Hyland R, Roe EG, Jones BC, Smith DA. Identification of the cytochrome P450 enzymes involved in the N-demethylation of sildenafil. *Br J Clin Pharmacol*. 2001;51(3):239-248. doi:10.1046/j.1365-2125.2001.00318.x
163. Choi MK, Song IS. Characterization of efflux transport of the PDE5 inhibitors, vardenafil and sildenafil. *J Pharm Pharmacol*. 2012;64(8):1074-1083. doi:10.1111/j.2042-7158.2012.01498.x
164. Wang E jia, Lew K, Casciano CN, Clement RP, Johnson WW. Interaction of common azole antifungals with P glycoprotein. *Antimicrob Agents Chemother*. 2002;46(1):160-165. doi:10.1128/AAC.46.1.160-165.2002
165. Cardoso J de O, Oliveira RV, Lu JBL, Desta Z. In Vitro Metabolism of Montelukast by Cytochrome P450s and UDP-Glucuronosyltransferases. *Drug Metab Dispos Biol Fate Chem*. 2015;43(12):1905-1916. doi:10.1124/dmd.115.065763
166. Stoica BA, Bordeianu G, Stanescu R, Serban DN, Nechifor M. A new method for the quantification of superoxide dismutase mimics with an allopurinol-xanthine oxidase-lucigenin enhanced system. *J Biol Inorg Chem JBIC Publ Soc Biol Inorg Chem*. 2011;16(5):753-761. doi:10.1007/s00775-011-0777-8
167. Kobayashi Y, Ohshiro N, Sakai R, Ohbayashi M, Kohyama N, Yamamoto T. Transport mechanism and substrate specificity of human organic anion transporter 2 (hOat2 [SLC22A7]). *J Pharm Pharmacol*. 2005;57(5):573-578. doi:10.1211/0022357055966
168. Wen CC, Yee SW, Liang X, et al. Genome-wide association study identifies ABCG2 (BCRP) as an allopurinol transporter and a determinant of drug response. *Clin Pharmacol Ther*. 2015;97(5):518-525. doi:10.1002/cpt.89
169. *LiverTox: Clinical and Research Information on Drug-Induced Liver Injury*. National Institute of Diabetes and Digestive and Kidney Diseases; 2012. Accessed July 15, 2022. <http://www.ncbi.nlm.nih.gov/books/NBK547852/>
170. Dixon CM, Park GR, Tarbit MH. Characterization of the enzyme responsible for the metabolism of sumatriptan in human liver. *Biochem Pharmacol*. 1994;47(7):1253-1257. doi:10.1016/0006-2952(94)90397-2
171. Matthaei J, Kuron D, Faltraco F, et al. OCT1 mediates hepatic uptake of sumatriptan and loss-of-function OCT1 polymorphisms affect sumatriptan pharmacokinetics. *Clin Pharmacol Ther*. 2016;99(6):633-641. doi:10.1002/cpt.317
172. Desta Z, Wu GM, Morocho AM, Flockhart DA. The gastroprokinetic and antiemetic drug metoclopramide is a substrate and inhibitor of cytochrome P450 2D6. *Drug Metab Dispos Biol Fate Chem*. 2002;30(3):336-343. doi:10.1124/dmd.30.3.336
173. Feng B, Mills JB, Davidson RE, et al. In vitro P-glycoprotein assays to predict the in vivo interactions of P-glycoprotein with drugs in the central nervous system. *Drug Metab Dispos Biol Fate Chem*. 2008;36(2):268-275. doi:10.1124/dmd.107.017434
174. Jordan CG, Rashidi MR, Laljee H, Clarke SE, Brown JE, Beedham C. Aldehyde oxidase-catalysed oxidation of methotrexate in the liver of guinea-pig, rabbit and man. *J Pharm Pharmacol*. 1999;51(4):411-418. doi:10.1211/0022357991772619
175. de Graaf D, Sharma RC, Mechetner EB, Schimke RT, Roninson IB. P-glycoprotein confers methotrexate resistance in 3T6 cells with deficient carrier-mediated methotrexate uptake. *Proc Natl Acad Sci U S A*. 1996;93(3):1238-1242. doi:10.1073/pnas.93.3.1238
176. Zeng H, Chen ZS, Belinsky MG, Rea PA, Kruh GD. Transport of methotrexate (MTX) and folates by multidrug resistance protein (MRP) 3 and MRP1: effect of polyglutamylation on MTX transport. *Cancer Res*. 2001;61(19):7225-7232.
177. Chen ZS, Lee K, Walther S, et al. Analysis of methotrexate and folate transport by multidrug resistance protein 4 (ABCC4): MRP4 is a component of the methotrexate efflux system. *Cancer Res*. 2002;62(11):3144-3150.
178. Badagnani I, Castro RA, Taylor TR, et al. Interaction of methotrexate with organic-anion transporting polypeptide 1A2 and

its genetic variants. *J Pharmacol Exp Ther*. 2006;318(2):521-529. doi:10.1124/jpet.106.104364

179. Abe T, Unno M, Onogawa T, et al. LST-2, a human liver-specific organic anion transporter, determines methotrexate sensitivity in gastrointestinal cancers. *Gastroenterology*. 2001;120(7):1689-1699. doi:10.1053/gast.2001.24804

180. Huskey SW, Dean DC, Miller RR, Rasmusson GH, Chiu SH. Identification of human cytochrome P450 isozymes responsible for the in vitro oxidative metabolism of finasteride. *Drug Metab Dispos Biol Fate Chem*. 1995;23(10):1126-1135.

181. Tirouvanziam R, Conrad CK, Bottiglieri T, Herzenberg LA, Moss RB, Herzenberg LA. High-dose oral N-acetylcysteine, a glutathione prodrug, modulates inflammation in cystic fibrosis. *Proc Natl Acad Sci U S A*. 2006;103(12):4628-4633. doi:10.1073/pnas.0511304103

182. Raftos JE, Whillier S, Chapman BE, Kuchel PW. Kinetics of uptake and deacetylation of N-acetylcysteine by human erythrocytes. *Int J Biochem Cell Biol*. 2007;39(9):1698-1706. doi:10.1016/j.biocel.2007.04.014

183. Sun Z, Murry DJ, Sanghani SP, et al. Methylphenidate is stereoselectively hydrolyzed by human carboxylesterase CES1A1. *J Pharmacol Exp Ther*. 2004;310(2):469-476. doi:10.1124/jpet.104.067116
