# Supplementary material for: Drug metabolism and drug transport of the 100 most prescribed oral drugs
Source: PubMed Central journal article supplement — Basic Clin Pharmacol Toxicol. 2022 Aug 24;131(5):311–24. doi: 10.1111/bcpt.13780 (PMC9804310; doi:10.1111/bcpt.13780), 2022-08-24
Supplement: BCPT-131-311-s002.pdf [file BCPT-131-311-s002.pdf]

Table S2. Most prescribed drugs from the six countries combined with the percentage each drug constitute from the list. The countries included are Australia, Denmark, England, Norway, Scotland, and Sweden.

| Ranking | Drugs Australia <sup>a</sup> | % AUS | Drugs Denmark <sup>b</sup> | % DK | Drugs England <sup>c</sup> | % Eng | Drugs Norway <sup>d</sup> | % NO | Drugs Scotland <sup>e</sup> | % SC | Drugs Sweden <sup>b</sup> | % SE |
|---------|------------------------------|-------|----------------------------|------|----------------------------|-------|---------------------------|------|-----------------------------|------|---------------------------|------|
| 1       | rosuvastatin                 | 3,99  | paracetamol                | 6,31 | atorvastatin               | 4,34  | paracetamol               | 5,52 | paracetamol                 | 6,34 | paracetamol               | 4,74 |
| 2       | atorvastatin                 | 3,82  | phenoxymethyl penicillin   | 3,66 | paracetamol                | 3,70  | phenoxymethylpenicillin   | 2,26 | omeprazole                  | 3,84 | omeprazole                | 2,38 |
| 3       | amlodipine                   | 3,34  | ibuprofen                  | 3,49 | levothyroxine sodium       | 3,34  | fluticasone               | 2,24 | codeine                     | 3,20 | phenoxymethylpenicillin   | 2,29 |
| 4       | perindopril                  | 3,14  | losartan                   | 2,35 | omeprazole                 | 3,22  | atorvastatin              | 2,15 | simvastatin                 | 2,94 | metoprolol                | 1,91 |
| 5       | amoxicillin                  | 3,08  | amlodipine                 | 2,10 | amlodipine                 | 3,01  | esomeprazole              | 2,12 | levothyroxine sodium        | 2,66 | acetylsalicylic acid      | 1,83 |
| 6       | esomeprazole                 | 2,63  | hydrocortisone             | 1,90 | ramipril                   | 2,97  | acetylsalicylic acid      | 2,05 | salbutamol                  | 2,47 | enalapril                 | 1,76 |
| 7       | metformin                    | 2,37  | pantoprazole               | 1,88 | lansoprazole               | 2,64  | codeine                   | 2,02 | aspirin                     | 2,42 | atorvastatin              | 1,73 |
| 8       | pantoprazole                 | 2,35  | simvastatin                | 1,78 | simvastatin                | 2,52  | diclofenac                | 1,93 | amlodipine                  | 1,98 | mometasone                | 1,70 |
| 9       | diuretics                    | 2,11  | atorvastatin               | 1,75 | bisoprolol                 | 2,45  | desloratadine             | 1,81 | atorvastatin                | 1,88 | budesonide                | 1,68 |
| 10      | telmisartan                  | 2,07  | acetylsalicylic acid       | 1,75 | colecalfiferol             | 2,45  | pantoprazole              | 1,80 | ramipril                    | 1,84 | amlodipine                | 1,66 |
| 11      | irbesartan                   | 1,96  | ethinylestradiol           | 1,64 | aspirin                    | 2,43  | mometasone                | 1,78 | emollients                  | 1,76 | levothyroxine sodium      | 1,53 |
| 12      | paracetamol                  | 1,78  | metoprolol                 | 1,59 | metformin                  | 2,26  | cetirizine                | 1,71 | lansoprazole                | 1,63 | desloratadine             | 1,50 |
| 13      | cefalexin                    | 1,74  | pivmecillinam              | 1,58 | salbutamol                 | 2,24  | salbutamol                | 1,68 | bendroflumethiazide         | 1,51 | hydrocortisone            | 1,49 |
| 14      | oxycodone                    | 1,64  | fusidic acid               | 1,53 | codeine                    | 2,08  | metoprolol                | 1,68 | bisoprolol                  | 1,47 | cyanocobalamin            | 1,48 |
| 15      | escitalopram                 | 1,45  | mometasone                 | 1,46 | sertraline                 | 1,54  | zopiclone                 | 1,63 | amoxicillin                 | 1,46 | losartan                  | 1,45 |
| 16      | Candesartan cilexetil        | 1,43  | amoxicillin                | 1,41 | citalopram                 | 1,47  | naproxen                  | 1,55 | amitriptyline               | 1,30 | naproxen                  | 1,45 |
| 17      | beta-lactamase inhibitor     | 1,43  | levonorgestrel             | 1,39 | amitriptyline              | 1,40  | ethylmorphine             | 1,51 | citalopram                  | 1,28 | zopiclone                 | 1,44 |
| 18      | sertraline                   | 1,38  | bendroflumethiazide        | 1,28 | beclometasone              | 1,34  | prednisolone              | 1,49 | metformin                   | 1,26 | macrogol                  | 1,39 |

|    |                      |      |                      |      |                      |      |                        |      |                          |      |                       |      |
|----|----------------------|------|----------------------|------|----------------------|------|------------------------|------|--------------------------|------|-----------------------|------|
| 19 | antipyretics         | 1,24 | potassium            | 1,28 | furosemide           | 1,24 | hydrocortison e        | 1,43 | beclometason e           | 1,15 | betamethason e        | 1,32 |
| 20 | other analgesics     | 1,24 | tramadol             | 1,21 | amoxicillin          | 1,17 | amlodipine             | 1,35 | tramadol                 | 1,15 | simvastatin           | 1,28 |
| 21 | codeine              | 1,21 | enalapril            | 1,20 | influenza            | 1,07 | ibuprofen              | 1,32 | calcium with vitamin d   | 1,12 | salbutamol            | 1,25 |
| 22 | fluticasone          | 1,19 | budesonide           | 1,18 | bendroflumet hiazide | 1,03 | tramadol               | 1,26 | ibuprofen                | 1,11 | oxycodone             | 1,22 |
| 23 | salbutamol           | 1,12 | estradiol            | 1,15 | losartan             | 1,02 | ethinylestradi ol      | 1,26 | furosemide               | 1,11 | expectorants          | 1,15 |
| 24 | prednisolone         | 1,07 | salbutamol           | 1,11 | clopidogrel          | 1,01 | levothyroxine sodium   | 1,26 | lisinopril               | 1,08 | opium derivatives     | 1,15 |
| 25 | ezetimibe            | 1,06 | betamethasone        | 1,09 | mirtazapine          | 0,93 | Candesartan cilexetil  | 1,17 | atenolol                 | 1,06 | combinations          | 1,15 |
| 26 | simvastatin          | 1,03 | potassium chloride   | 1,08 | lisinopril           | 0,92 | chloramphenicol        | 1,17 | dihydrocodei ne tartrate | 0,98 | metformin             | 1,11 |
| 27 | ramipril             | 1,01 | diuretics            | 1,07 | fluticasone          | 0,91 | pivmecillinam          | 1,16 | diazepam                 | 0,94 | Candesartan cilexetil | 1,04 |
| 28 | venlafaxine          | 0,97 | metformin            | 1,04 | warfarin             | 0,86 | simvastatin            | 1,02 | sertraline               | 0,94 | prednisolone          | 1,01 |
| 29 | olmesartan medoxomil | 0,97 | dicloxacillin        | 0,99 | folic acid           | 0,83 | levocabastine          | 0,96 | warfarin                 | 0,92 | furosemide            | 0,99 |
| 30 | atenolol             | 0,95 | antiinfectives       | 0,98 | gabapentin           | 0,76 | diuretics              | 0,95 | fluoxetine               | 0,91 | sertraline            | 0,91 |
| 31 | mirtazapine          | 0,85 | furosemide           | 0,97 | tamsulosin           | 0,75 | calcium with vitamin d | 0,94 | fluticasone              | 0,89 | antiinfectives        | 0,90 |
| 32 | tramadol             | 0,80 | chloramphenicol      | 0,90 | prednisolone         | 0,75 | colecalfiferol         | 0,91 | naproxen                 | 0,89 | folic acid            | 0,90 |
| 33 | rabeprazole          | 0,78 | levothyroxine sodium | 0,90 | gliclazide           | 0,74 | levonorgestrel         | 0,88 | clopidogrel              | 0,85 | flucloxacillin        | 0,90 |
| 34 | metoprolol           | 0,78 | corticosteroids      | 0,89 | naproxen             | 0,74 | estradiol              | 0,87 | cetirizine               | 0,79 | diuretics             | 0,89 |
| 35 | diazepam             | 0,76 | imidazoles/triazoles | 0,89 | atenolol             | 0,74 | carbamide              | 0,81 | hydrocortison e          | 0,78 | carbamide             | 0,87 |
| 36 | amitriptyline        | 0,76 | fluticasone          | 0,82 | pregabalin           | 0,73 | trimethoprim           | 0,80 | mirtazapine              | 0,78 | pivmecillinam         | 0,86 |

|    |                                |      |                          |      |                                |      |                                |      |                                    |      |                      |      |
|----|--------------------------------|------|--------------------------|------|--------------------------------|------|--------------------------------|------|------------------------------------|------|----------------------|------|
| 37 | meloxicam                      | 0,75 | dexamethasone            | 0,80 | glucose blood testing reagents | 0,72 | valsartan                      | 0,78 | prednisolone                       | 0,76 | formoterol           | 0,82 |
| 38 | doxycycline                    | 0,74 | lansoprazole             | 0,78 | Candesartan cilexetil          | 0,72 | oxazepam                       | 0,77 | gabapentin                         | 0,75 | codeine              | 0,81 |
| 39 | apixaban                       | 0,71 | fluocortolone            | 0,74 | fluoxetine                     | 0,70 | losartan                       | 0,76 | blood glucose testing strips       | 0,69 | hydroxyzine          | 0,80 |
| 40 | clopidogrel                    | 0,70 | formoterol               | 0,74 | other emollient preps          | 0,69 | metformin                      | 0,74 | compound alginic acid preparations | 0,68 | diclofenac           | 0,79 |
| 41 | desvenlafaxine                 | 0,70 | prednisolone             | 0,73 | doxazosin                      | 0,68 | antiinfectives                 | 0,73 | salmeterol                         | 0,67 | sodium fluoride      | 0,78 |
| 42 | salmeterol                     | 0,69 | clopidogrel              | 0,73 | tramadol                       | 0,66 | desogestrel                    | 0,71 | macrogol                           | 0,67 | oxazepam             | 0,78 |
| 43 | lercanidipine                  | 0,69 | codeine                  | 0,72 | macrogol                       | 0,65 | doxycycline                    | 0,71 | propranolol                        | 0,65 | ethinylestradiol     | 0,78 |
| 44 | fluoxetine                     | 0,66 | omeprazole               | 0,68 | alendronic acid                | 0,63 | betamethasone                  | 0,70 | folic acid                         | 0,64 | bisoprolol           | 0,76 |
| 45 | artificial tears               | 0,66 | ramipril                 | 0,65 | ranitidine                     | 0,62 | amoxicillin                    | 0,69 | hypodermic equipment               | 0,62 | estradiol            | 0,75 |
| 46 | other indifferent preparations | 0,66 | metronidazole            | 0,64 | allopurinol                    | 0,60 | melatonin                      | 0,66 | losartan                           | 0,62 | mirtazapine          | 0,71 |
| 47 | naloxone                       | 0,64 | terbutaline              | 0,64 | ibuprofen                      | 0,60 | phenylpropanolamine            | 0,65 | zopiclone                          | 0,62 | felodipine           | 0,69 |
| 48 | rivaroxaban                    | 0,63 | sertraline               | 0,64 | zopiclone                      | 0,55 | dicloxacillin                  | 0,64 | formoterol                         | 0,61 | terbutaline          | 0,69 |
| 49 | sitagliptin                    | 0,61 | sildenafil               | 0,60 | propranolol                    | 0,55 | escitalopram                   | 0,63 | ranitidine                         | 0,61 | esomeprazole         | 0,66 |
| 50 | omeprazole                     | 0,61 | azithromycin             | 0,60 | cetirizine                     | 0,53 | diazepam                       | 0,62 | alendronic acid                    | 0,58 | propiomazine         | 0,65 |
| 51 | valsartan                      | 0,60 | fluconazole              | 0,59 | diazepam                       | 0,52 | vitamin b-combin               | 0,62 | barrier preparations               | 0,57 | corticosteroids      | 0,64 |
| 52 | temazepam                      | 0,57 | zopiclone                | 0,59 | morphine                       | 0,52 | artificial tears               | 0,57 | emollient                          | 0,57 | imidazoles/triazoles | 0,64 |
| 53 | duloxetine                     | 0,57 | beta-lactamase inhibitor | 0,58 | isosorbide mononitrate         | 0,49 | other indifferent preparations | 0,57 | Candesartan cilexetil              | 0,56 | nitrofurantoin       | 0,63 |

|    |                      |      |                     |      |                                    |      |                      |      |                         |      |                                |      |
|----|----------------------|------|---------------------|------|------------------------------------|------|----------------------|------|-------------------------|------|--------------------------------|------|
| 54 | levothyroxine sodium | 0,56 | morphine            | 0,58 | ferrous fumarate                   | 0,48 | formoterol           | 0,57 | tiotropium bromide      | 0,55 | zolpidem                       | 0,63 |
| 55 | budesonide           | 0,56 | mebendazole         | 0,56 | indapamide                         | 0,48 | etoricoxib           | 0,57 | tamsulosin              | 0,55 | doxycycline                    | 0,62 |
| 56 | formoterol           | 0,56 | cetirizine          | 0,54 | apixaban                           | 0,47 | tamsulosin           | 0,53 | perindopril             | 0,52 | amoxicillin                    | 0,61 |
| 57 | gliclazide           | 0,56 | fluticasone furoate | 0,53 | perindopril                        | 0,47 | acetylcysteine       | 0,52 | trimethoprim            | 0,52 | ferrous sulfate                | 0,60 |
| 58 | citalopram           | 0,54 | alendronic acid     | 0,52 | hydrocortisone                     | 0,46 | apixaban             | 0,49 | clotrimazole            | 0,52 | acetylcysteine                 | 0,60 |
| 59 | ethinylestradiol     | 0,54 | macrogol            | 0,52 | venlafaxine                        | 0,46 | corticosteroids      | 0,49 | gliclazide              | 0,51 | fluticasone                    | 0,58 |
| 60 | levonorgestrel       | 0,54 | clobetasol          | 0,52 | alginic acid compound preparations | 0,44 | imidazoles/triazoles | 0,49 | morphine                | 0,51 | ibuprofen                      | 0,57 |
| 61 | furosemide           | 0,53 | fexofenadine        | 0,52 | tiotropium bromide                 | 0,44 | dexamethasone        | 0,48 | diclofenac              | 0,49 | citalopram                     | 0,55 |
| 62 | celecoxib            | 0,53 | citalopram          | 0,52 | flucloxacillin                     | 0,42 | furosemide           | 0,46 | lactulose               | 0,49 | desogestrel                    | 0,55 |
| 63 | bisoprolol           | 0,52 | aciclovir           | 0,51 | nitrofurantoin                     | 0,42 | zolpidem             | 0,44 | flucloxacillin          | 0,48 | colecalfiferol                 | 0,52 |
| 64 | warfarin             | 0,47 | ciprofloxacin       | 0,51 | enteral nutrition                  | 0,41 | budesonide           | 0,43 | pregabalin              | 0,47 | apixaban                       | 0,52 |
| 65 | tiotropium bromide   | 0,47 | roxithromycin       | 0,50 | rivaroxaban                        | 0,41 | alimemazine          | 0,43 | allopurinol             | 0,47 | melatonin                      | 0,48 |
| 66 | betamethasone        | 0,47 | ketoconazole        | 0,49 | senna                              | 0,41 | influenza            | 0,43 | methadone hydrochloride | 0,47 | chlorzoxazone                  | 0,48 |
| 67 | estradiol            | 0,46 | antibiotics         | 0,48 | budesonide                         | 0,40 | folic acid           | 0,42 | isosorbide mononitrate  | 0,46 | ciprofloxacin                  | 0,46 |
| 68 | macrogol             | 0,45 | mirtazapine         | 0,47 | felodipine                         | 0,38 | ezetimibe            | 0,42 | betamethasone           | 0,44 | artificial tears               | 0,46 |
| 69 | dutasteride          | 0,44 | oxycodone           | 0,45 | finasteride                        | 0,37 | ramipril             | 0,42 | senna                   | 0,44 | other indifferent preparations | 0,46 |
| 70 | tamsulosin           | 0,44 | gabapentin          | 0,45 | dihydrocodeine tartrate            | 0,37 | salmeterol           | 0,41 | venlafaxine             | 0,43 | clindamycin                    | 0,45 |
| 71 | allopurinol          | 0,43 | cyanocobalamin      | 0,43 | quetiapine                         | 0,36 | clobetasol           | 0,41 | doxazosin               | 0,43 | hydrochlorothiazide            | 0,45 |

|    |                         |      |                    |      |                         |      |                   |      |                     |      |                         |      |
|----|-------------------------|------|--------------------|------|-------------------------|------|-------------------|------|---------------------|------|-------------------------|------|
| 72 | empagliflozin           | 0,42 | diclofenac         | 0,43 | sildenafil              | 0,36 | sulfamethoxazole  | 0,41 | budesonide          | 0,41 | alfuzosin               | 0,44 |
| 73 | buprenorphine           | 0,41 | olopatadine        | 0,42 | betamethasone           | 0,34 | hydroxocobalamin  | 0,41 | mometasone          | 0,41 | glyceryl trinitrate     | 0,43 |
| 74 | latanoprost             | 0,41 | sulfamethizole     | 0,41 | buprenorphine           | 0,33 | quetiapine        | 0,40 | carbomer            | 0,36 | escitalopram            | 0,43 |
| 75 | fenofibrate             | 0,40 | tiotropium bromide | 0,39 | fexofenadine            | 0,33 | metoclopramide    | 0,39 | doxycycline         | 0,33 | hydrocortisone butyrate | 0,43 |
| 76 | trimethoprim            | 0,40 | sumatriptan        | 0,38 | digoxin                 | 0,31 | erythromycin      | 0,39 | eye products        | 0,32 | levonorgestrel          | 0,42 |
| 77 | roxithromycin           | 0,36 | miconazole         | 0,38 | ethinylestradiol        | 0,31 | clindamycin       | 0,39 | glyceryl trinitrate | 0,32 | sodium picosulfate      | 0,42 |
| 78 | quetiapine              | 0,34 | melatonin          | 0,38 | lactulose               | 0,30 | sumatriptan       | 0,38 | nicotine            | 0,32 | dexamethasone           | 0,42 |
| 79 | antiinfectives          | 0,33 | quetiapine         | 0,37 | montelukast             | 0,30 | amitriptyline     | 0,37 | ferrous fumarate    | 0,32 | warfarin                | 0,42 |
| 80 | olanzapine              | 0,33 | warfarin           | 0,36 | thiamine                | 0,29 | macrogol          | 0,36 | ethinylestradiol    | 0,31 | promethazine            | 0,40 |
| 81 | moxonidine              | 0,32 | zolpidem           | 0,35 | doxycycline             | 0,29 | oxycodone         | 0,34 | levonorgestrel      | 0,31 | sildenafil              | 0,40 |
| 82 | prostaglandin analogues | 0,32 | allopurinol        | 0,34 | desogestrel             | 0,29 | allopurinol       | 0,33 | finasteride         | 0,31 | sterculia               | 0,39 |
| 83 | mometasone              | 0,31 | desloratadine      | 0,34 | lamotrigine             | 0,29 | expectorants      | 0,33 | solifenacin         | 0,30 | lactulose               | 0,39 |
| 84 | hydrochlorothiazide     | 0,31 | oxazepam           | 0,34 | quinine                 | 0,29 | opium derivatives | 0,33 | quetiapine          | 0,29 | chloramphenicol         | 0,39 |
| 85 | diltiazem hydrochloride | 0,31 | spironolactone     | 0,34 | ferrous sulfate         | 0,28 | tadalafil         | 0,33 | nitrofurantoin      | 0,29 | timolol                 | 0,38 |
| 86 | paroxetine              | 0,31 | sodium fluoride    | 0,33 | diltiazem hydrochloride | 0,28 | sildenafil        | 0,33 | thiamine            | 0,29 | atenolol                | 0,38 |
| 87 | tapentadol              | 0,30 | rivaroxaban        | 0,32 | spironolactone          | 0,28 | olopatadine       | 0,32 | hypromellose        | 0,29 | ramipril                | 0,38 |
| 88 | ranitidine              | 0,30 | plastic iud        | 0,31 | latanoprost             | 0,28 | norethisterone    | 0,32 | nicorandil          | 0,28 | valaciclovir            | 0,37 |
| 89 | vilanterol              | 0,30 | progestogen        | 0,31 | hydroxocobalamin        | 0,27 | timolol           | 0,32 | fexofenadine        | 0,27 | etoricoxib              | 0,37 |
| 90 | methylprednisolone      | 0,28 | chlorzoxazone      | 0,30 | pravastatin             | 0,27 | lercanidipine     | 0,32 | clarithromycin      | 0,27 | drospirenone            | 0,36 |

|     |                        |      |                                |      |                         |      |                     |      |                          |      |                     |      |
|-----|------------------------|------|--------------------------------|------|-------------------------|------|---------------------|------|--------------------------|------|---------------------|------|
| 91  | metoclopramide         | 0,28 | naproxen                       | 0,30 | carbocisteine           | 0,27 | loratadine          | 0,31 | loratadine               | 0,27 | amitriptyline       | 0,36 |
| 92  | oxazepam               | 0,26 | artificial tears               | 0,29 | sitagliptin             | 0,26 | cyanocobalamin      | 0,31 | loperamide               | 0,27 | allopurinol         | 0,34 |
| 93  | methylphenidate        | 0,26 | other indifferent preparations | 0,29 | sodium valproate        | 0,26 | metronidazole       | 0,31 | prochlorperazine         | 0,27 | fluconazole         | 0,34 |
| 94  | dapagliflozin          | 0,26 | rosuvastatin                   | 0,29 | lercanidipine           | 0,26 | gabapentin          | 0,29 | trazodone hydrochloride  | 0,27 | finasteride         | 0,34 |
| 95  | denosumab              | 0,26 | lercanidipine                  | 0,29 | olanzapine              | 0,25 | fexofenadine        | 0,29 | phenoxymethylpenicillin  | 0,26 | clobetasol          | 0,34 |
| 96  | linagliptin            | 0,25 | terbinafine                    | 0,28 | solifenacin             | 0,25 | alendronic acid     | 0,29 | digoxin                  | 0,26 | fusidic acid        | 0,33 |
| 97  | isosorbide mononitrate | 0,24 | desogestrel                    | 0,28 | phenoxymethylpenicillin | 0,25 | fusidic acid        | 0,29 | chlorphenamine maleate   | 0,26 | clopidogrel         | 0,32 |
| 98  | other antiemetics      | 0,24 | venlafaxine                    | 0,28 | duloxetine              | 0,24 | mirtazapine         | 0,28 | colecalfiferol           | 0,26 | tramadol            | 0,32 |
| 99  | flucloxacillin         | 0,24 | tamsulosin                     | 0,27 | carbamazepine           | 0,24 | sodium fluoride     | 0,28 | mebeverine hydrochloride | 0,26 | spironolactone      | 0,32 |
| 100 | dexamethasone          | 0,23 | apixaban                       | 0,26 | rosuvastatin            | 0,23 | enalapril           | 0,27 | felodipine               | 0,25 | plastic iud         | 0,32 |
| 101 | diclofenac             | 0,23 | pregabalin                     | 0,25 | levetiracetam           | 0,23 | mirabegron          | 0,26 | chloramphenicol          | 0,25 | progestogen         | 0,32 |
| 102 | verapamil              | 0,23 | lamotrigine                    | 0,25 | levodopa                | 0,23 | bumetanide          | 0,26 | esomeprazole             | 0,25 | bendroflumethiazide | 0,31 |
| 103 | valproic acid          | 0,23 | clarithromycin                 | 0,24 | clarithromycin          | 0,23 | terbinafine         | 0,25 | quinine                  | 0,25 | venlafaxine         | 0,30 |
| 104 | prednisone             | 0,23 | magnesium hydroxide            | 0,24 | docusate sodium         | 0,23 | ranitidine          | 0,24 | oxycodone                | 0,24 | estriol             | 0,29 |
| 105 | sumatriptan            | 0,22 | trimethoprim                   | 0,24 | methadone hydrochloride | 0,22 | azithromycin        | 0,24 | hyoscine butylbromide    | 0,24 | phenylpropanolamine | 0,29 |
| 106 | propranolol            | 0,22 | expectorants                   | 0,23 | hypromellose            | 0,22 | glyceryl trinitrate | 0,24 | montelukast              | 0,24 | gabapentin          | 0,27 |
| 107 | combinations           | 0,22 | opium derivatives              | 0,23 | donepezil               | 0,22 | drospirenone        | 0,24 | methotrexate             | 0,24 | tiotropium bromide  | 0,27 |

|     |                            |      |                     |      |                          |      |                 |      |                         |      |                        |      |
|-----|----------------------------|------|---------------------|------|--------------------------|------|-----------------|------|-------------------------|------|------------------------|------|
| 108 | naproxen                   | 0,21 | folic acid          | 0,23 | loratadine               | 0,22 | clopidogrel     | 0,24 | ferrous sulfate         | 0,24 | sumatriptan            | 0,27 |
| 109 | pravastatin                | 0,21 | bisacodyl           | 0,22 | vitamin b compound       | 0,22 | methylphenidate | 0,23 | rosuvastatin            | 0,23 | alendronic acid        | 0,27 |
| 110 | clarithromycin             | 0,21 | methylphenidate     | 0,22 | methotrexate             | 0,22 | fluconazole     | 0,23 | carbamazepine           | 0,23 | methylphenidate        | 0,26 |
| 111 | decarboxylase inhibitor    | 0,21 | insulin aspart      | 0,22 | bimatoprost              | 0,22 | omeprazole      | 0,23 | sildenafil              | 0,23 | trimethoprim           | 0,25 |
| 112 | levodopa                   | 0,21 | promethazine        | 0,22 | mebeverine hydrochloride | 0,21 | ketoprofen      | 0,23 | diltiazem hydrochloride | 0,23 | isosorbide mononitrate | 0,25 |
| 113 | levetiracetam              | 0,20 | metoclopramide      | 0,21 | mometasone               | 0,21 | plastic iud     | 0,22 | enteral nutrition       | 0,23 | propranolol            | 0,25 |
| 114 | spironolactone             | 0,20 | hydroxocobalamin    | 0,21 | diclofenac sodium        | 0,20 | progestogen     | 0,22 | fusidic acid            | 0,23 | diazepam               | 0,25 |
| 115 | valaciclovir               | 0,20 | glyceryl trinitrate | 0,21 | estradiol                | 0,20 | sertraline      | 0,22 | lamotrigine             | 0,23 | insulin aspart         | 0,24 |
| 116 | felodipine                 | 0,20 | salmeterol          | 0,20 | trimethoprim             | 0,20 | methotrexate    | 0,22 | sodium valproate        | 0,22 | insulin glargine       | 0,24 |
| 117 | triamcinolone              | 0,20 | pneumococcus        | 0,20 | esomeprazole             | 0,20 | montelukast     | 0,22 | dressings               | 0,21 | cetirizine             | 0,24 |
| 118 | metronidazole              | 0,20 | amitriptyline       | 0,20 | linagliptin              | 0,19 | nystatin        | 0,22 | desogestrel             | 0,20 | montelukast            | 0,24 |
| 119 | risedronic acid            | 0,20 | duloxetine          | 0,20 | nifedipine               | 0,19 | insulin aspart  | 0,21 | clobetasone             | 0,20 | loratadine             | 0,24 |
| 120 | prazosin                   | 0,19 | proguanil           | 0,20 | irbesartan               | 0,19 | valaciclovir    | 0,21 | latanoprost             | 0,20 | latanoprost            | 0,24 |
| 121 | antiarrhythmics, class iii | 0,19 | norethisterone      | 0,19 | insulin aspart           | 0,19 | rosuvastatin    | 0,21 | enalapril               | 0,20 | loperamide             | 0,23 |
| 122 | brinzolamide               | 0,19 | carvedilol          | 0,19 | ezetimibe                | 0,18 | bisoprolol      | 0,21 | ispaghula husk          | 0,19 | metronidazole          | 0,23 |
| 123 | colchicine                 | 0,18 | esomeprazole        | 0,19 | risperidone              | 0,18 | warfarin        | 0,21 | nifedipine              | 0,19 | alimemazine            | 0,23 |
| 124 | risperidone                | 0,17 | hydrochlorothiazide | 0,19 | loperamide               | 0,18 | triamcinolone   | 0,21 | metronidazole           | 0,19 | rosuvastatin           | 0,22 |
| 125 | phenoxymethylpenicillin    | 0,17 | valsartan           | 0,19 | glyceryl trinitrate      | 0,18 | rizatriptan     | 0,20 | duloxetine              | 0,18 | cromoglicic acid       | 0,22 |
| 126 | rizatriptan                | 0,16 | timolol             | 0,19 | oxycodone                | 0,18 | ciprofloxacin   | 0,20 | sumatriptan             | 0,18 | insulin                | 0,22 |
| 127 | dabigatran etexilate       | 0,16 | insulin glargine    | 0,19 | sumatriptan              | 0,17 | antiseptics     | 0,20 | piroxicam               | 0,18 | dalteparin             | 0,22 |

|     |                     |      |                        |      |                         |      |                     |      |                            |      |                          |      |
|-----|---------------------|------|------------------------|------|-------------------------|------|---------------------|------|----------------------------|------|--------------------------|------|
| 128 | glyceryl trinitrate | 0,16 | montelukast            | 0,18 | enalapril               | 0,17 | tiotropium bromide  | 0,20 | benzydamine hydrochloride  | 0,18 | potassium chloride       | 0,22 |
| 129 | morphine            | 0,15 | latanoprost            | 0,18 | betahistine             | 0,17 | vilanterol          | 0,20 | insulin aspart             | 0,18 | methotrexate             | 0,22 |
| 130 | pramipexole         | 0,15 | propranolol            | 0,17 | bumetanide              | 0,17 | estrogen            | 0,20 | coal tar                   | 0,18 | morphine                 | 0,22 |
| 131 | lamotrigine         | 0,15 | quinine                | 0,17 | carbomer                | 0,17 | methenamine         | 0,20 | indapamide                 | 0,18 | nystatin                 | 0,21 |
| 132 | erythromycin        | 0,15 | diazepam               | 0,16 | nicorandil              | 0,16 | dalteparin          | 0,19 | irbesartan                 | 0,17 | metoclopramide           | 0,21 |
| 133 | lansoprazole        | 0,15 | liraglutide            | 0,16 | oxybutynin              | 0,16 | venlafaxine         | 0,19 | spironolactone             | 0,17 | nepafenac                | 0,20 |
| 134 | oxybutynin          | 0,14 | nystatin               | 0,16 | prochlorperazine        | 0,16 | rivaroxaban         | 0,19 | olanzapine                 | 0,17 | fluoxetine               | 0,20 |
| 135 | estriol             | 0,14 | isosorbide mononitrate | 0,16 | insulin glargine        | 0,16 | nitrofurantoin      | 0,19 | temazepam                  | 0,17 | potassium-sparing agents | 0,20 |
| 136 | fluvoxamine         | 0,14 | ferrous sulfate        | 0,15 | hyoscine butylbromide   | 0,16 | lamotrigine         | 0,18 | miconazole                 | 0,16 | mebendazole              | 0,20 |
| 137 | ondansetron         | 0,14 | methotrexate           | 0,15 | clavulanic acid         | 0,15 | lansoprazole        | 0,18 | wound management dressings | 0,16 | sitagliptin              | 0,19 |
| 138 | amiodarone          | 0,13 | calcipotriol           | 0,15 | mesalazine              | 0,15 | ipratropium bromide | 0,18 | pravastatin                | 0,16 | lamotrigine              | 0,19 |
| 139 | sulfamethoxazole    | 0,13 | tobramycin             | 0,15 | metronidazole           | 0,14 | ferrous sulfate     | 0,18 | erythromycin               | 0,15 | pantoprazole             | 0,18 |
| 140 | chloramphenicol     | 0,13 | valaciclovir           | 0,15 | sodium fluoride         | 0,14 | adapalene           | 0,18 | mesalazine                 | 0,15 | ezetimibe                | 0,18 |
| 141 | enoxaparin          | 0,13 | bisoprolol             | 0,14 | dexamethasone           | 0,14 | insulin             | 0,18 | sitagliptin                | 0,15 | duloxetine               | 0,18 |
| 142 | donepezil           | 0,12 | felodipine             | 0,14 | paroxetine              | 0,14 | ketotifen           | 0,18 | lymecycline                | 0,15 | rivaroxaban              | 0,18 |
| 143 | nizatidine          | 0,12 | sodium picosulfate     | 0,14 | chloramphenicol         | 0,14 | dutasteride         | 0,18 | gluten free bread          | 0,15 | lymecycline              | 0,16 |
| 144 | neбиволol           | 0,12 | clindamycin            | 0,14 | lidocaine hydrochloride | 0,14 | hydroxyzine         | 0,17 | insulin glargine           | 0,15 | beta-lactamase inhibitor | 0,16 |
| 145 | mydriatics          | 0,12 | escitalopram           | 0,14 | tolterodine             | 0,13 | hydrochlorothiazide | 0,17 | carbocisteine              | 0,15 | naloxone                 | 0,16 |



|     |                               |      |                      |      |                            |      |                        |      |                          |      |                  |      |
|-----|-------------------------------|------|----------------------|------|----------------------------|------|------------------------|------|--------------------------|------|------------------|------|
| 146 | flecainide                    | 0,12 | ezetimibe            | 0,13 | pantoprazole               | 0,13 | epinephrine            | 0,17 | neomycin sulfate         | 0,15 | pregabalin       | 0,16 |
| 147 | insulin glargine              | 0,12 | tetracycline         | 0,13 | memantine hydrochloride    | 0,13 | etonogestrel           | 0,16 | paroxetine               | 0,15 | ketoprofen       | 0,16 |
| 148 | nifedipine                    | 0,12 | pramipexole          | 0,13 | carbidopa                  | 0,13 | antibiotics            | 0,16 | citric acid              | 0,14 | sulfamethoxazole | 0,15 |
| 149 | fentanyl                      | 0,12 | mirabegron           | 0,13 | bisacodyl                  | 0,13 | proguanil              | 0,16 | atomisers, hand operated | 0,14 | clobetasone      | 0,15 |
| 150 | hydroxocobalamin              | 0,11 | insulin degludec     | 0,13 | clobetasone                | 0,12 | lymecycline            | 0,15 | sodium fluoride          | 0,14 | epinephrine      | 0,15 |
| 151 | topiramate                    | 0,11 | norgestimate         | 0,13 | mirabegron                 | 0,12 | calcipotriol           | 0,15 | levetiracetam            | 0,14 | quetiapine       | 0,15 |
| 152 | methotrexate                  | 0,11 | doxycycline          | 0,13 | ispaghula husk             | 0,12 | loperamide             | 0,15 | terbutaline              | 0,14 | lisdexamfetamine | 0,15 |
| 153 | mesalazine                    | 0,11 | alfuzosin            | 0,13 | hydroxychloroquine sulfate | 0,12 | cromoglicic acid       | 0,15 | donepezil                | 0,14 | silicones        | 0,15 |
| 154 | ibuprofen                     | 0,11 | pivampicillin        | 0,12 | estradiol with progestogen | 0,12 | nifedipine             | 0,15 | clavulanic acid          | 0,13 | buprenorphine    | 0,14 |
| 155 | iron, parenteral preparations | 0,11 | tadalafil            | 0,12 | promethazine               | 0,12 | pregabalin             | 0,15 | fluconazole              | 0,13 | calcipotriol     | 0,14 |
| 156 | aripiprazole                  | 0,11 | gestodene            | 0,12 | trazodone hydrochloride    | 0,12 | ketoconazole           | 0,15 | risperidone              | 0,13 | ketoconazole     | 0,13 |
| 157 | carvedilol                    | 0,10 | finasteride          | 0,12 | chlorphenamine maleate     | 0,12 | latanoprost            | 0,14 | protectives              | 0,13 | tranexamic acid  | 0,13 |
| 158 | domperidone                   | 0,10 | loratadine           | 0,12 | methylphenidate            | 0,12 | beclometasone          | 0,14 | skin fillers             | 0,13 | tadalafil        | 0,13 |
| 159 | dexamfetamine                 | 0,10 | thiamazole           | 0,11 | aripiprazole               | 0,12 | spironolactone         | 0,14 | oxybutynin               | 0,13 | norethisterone   | 0,13 |
| 160 | dosulepin                     | 0,10 | antiseptics          | 0,11 | fentanyl                   | 0,12 | tetryzoline            | 0,14 | chlorhexidine gluconate  | 0,13 | olanzapine       | 0,13 |
| 161 | digoxin                       | 0,10 | adapalene            | 0,11 | baclofen                   | 0,12 | terbutaline            | 0,13 | hydroxocobalamin         | 0,13 | bupropion        | 0,13 |
| 162 | cefaclor                      | 0,10 | dabigatran etexilate | 0,11 | escitalopram               | 0,11 | glucosamine            | 0,13 | sodium cromoglicate      | 0,13 | mirabegron       | 0,13 |
| 163 | exenatide                     | 0,10 | glimepiride          | 0,11 | fusidic acid               | 0,11 | isosorbide mononitrate | 0,13 | betahistine              | 0,12 | proguanil        | 0,13 |

|     |                      |      |                        |      |                                      |      |                        |      |                              |      |                     |      |
|-----|----------------------|------|------------------------|------|--------------------------------------|------|------------------------|------|------------------------------|------|---------------------|------|
| 164 | umeclidinium bromide | 0,10 | mesalazine             | 0,10 | lorazepam                            | 0,11 | glimepiride            | 0,13 | fentanyl                     | 0,12 | magnesium hydroxide | 0,13 |
| 165 | indometacin          | 0,10 | empagliflozin          | 0,10 | emollient bath & shower preparations | 0,11 | mesalazine             | 0,13 | lercanidipine                | 0,12 | azelaic acid        | 0,13 |
| 166 | lisinopril           | 0,10 | nitrofurantoin         | 0,10 | lymecycline                          | 0,11 | mianserin              | 0,12 | sulfasalazine                | 0,12 | digoxin             | 0,13 |
| 167 | quinolines           | 0,09 | olanzapine             | 0,10 | calcipotriol                         | 0,11 | enoxaparin             | 0,12 | bandages                     | 0,12 | tinzaparin          | 0,13 |
| 168 | lisdexamfetamine     | 0,09 | estrogen               | 0,10 | sodium cromoglicate                  | 0,11 | pneumococculus         | 0,12 | rivaroxaban                  | 0,12 | levocabastine       | 0,13 |
| 169 | fluorometholone      | 0,09 | alprazolam             | 0,10 | other food for special diet preps    | 0,10 | isotretinoin           | 0,12 | aciclovir                    | 0,12 | pramipexole         | 0,13 |
| 170 | varenicline          | 0,09 | isotretinoin           | 0,10 | temazepam                            | 0,10 | zolmitriptan           | 0,12 | hydroxychloroquine sulfate   | 0,11 | cefadroxil          | 0,12 |
| 171 | aflibercept          | 0,09 | olodaterol             | 0,10 | alogliptin                           | 0,10 | irbesartan             | 0,11 | tolterodine                  | 0,11 | risperidone         | 0,12 |
| 172 | indapamide           | 0,09 | tacrolimus             | 0,10 | brinzolamide                         | 0,10 | desonide               | 0,11 | compound rectal preparations | 0,11 | clemastine          | 0,12 |
| 173 | sacubitril           | 0,09 | Candesartan cilexetil  | 0,09 | clonazepam                           | 0,10 | lactulose              | 0,11 | metoclopramide               | 0,11 | salmeterol          | 0,12 |
| 174 | insulin aspart       | 0,09 | fentanyl               | 0,09 | melatonin                            | 0,10 | lisinopril             | 0,11 | stockinette                  | 0,11 | mesalazine          | 0,11 |
| 175 | carbamazepine        | 0,09 | beclometasone          | 0,09 | dapagliflozin                        | 0,10 | piroxicam              | 0,11 | azathioprine                 | 0,11 | erythromycin        | 0,11 |
| 176 | clindamycin          | 0,09 | methylprednisolone     | 0,09 | benserazide                          | 0,10 | carvedilol             | 0,11 | cyclizine                    | 0,11 | medroxyprogesterone | 0,11 |
| 177 | clonidine            | 0,09 | risperidone            | 0,09 | timolol                              | 0,10 | fluocinolone acetonide | 0,11 | zolpidem                     | 0,11 | adapalene           | 0,11 |
| 178 | potassium chloride   | 0,09 | glycopyrronium bromide | 0,09 | cyanocobalamin                       | 0,10 | empagliflozin          | 0,11 | lorazepam                    | 0,11 | lercanidipine       | 0,11 |
| 179 | calcipotriol         | 0,09 | indacaterol            | 0,09 | aciclovir                            | 0,10 | atenolol               | 0,11 | clobetasol                   | 0,10 | empagliflozin       | 0,10 |

a: Number of prescriptions, b: Number of prescriptions per 1000 citizens, c: Number of dispensed items, d: Number of unique individuals buying a drug.
